1 **Cross-protective immune responses induced by sequential influenza**  
2 **virus infection and by sequential vaccination with inactivated**  
3 **influenza vaccines**

4  
5  
6 Wei Dong<sup>a</sup>, Yoshita Bhide<sup>a</sup>, Federica Sicca<sup>a</sup>, Tjarko Meijerhof<sup>a</sup>, Kate Guilfoyle<sup>b\*</sup>, Othmar G.  
7 Engelhardt<sup>b</sup>, Louis Boon<sup>c</sup>, Cornelis A.M. de Haan<sup>d</sup>, George Carnell<sup>e</sup>, Nigel Temperton<sup>e</sup>,  
8 Jacqueline de Vries-Idema<sup>a</sup>, David Kelvin<sup>f,g</sup>, Anke Huckriede<sup>a#</sup>

9  
10 <sup>a</sup>*Department of Medical Microbiology, University of Groningen, University Medical Center*  
11 *Groningen, Groningen, The Netherlands*

12 <sup>b</sup>*National Institute for Biological Standards and Controls, Medicines and Healthcare products*  
13 *Regulatory Agency, Potters Bar, United Kingdom*

14 <sup>c</sup>*Bioceros, Utrecht, The Netherlands*

15 <sup>d</sup>*Virology Division, Department of Infectious Diseases & Immunology, Faculty of Veterinary*  
16 *Medicine, Utrecht University, Utrecht, The Netherlands*

17 <sup>e</sup>*Viral Pseudotype Unit, Medway School of Pharmacy, University of Kent, Chatham Maritime,*  
18 *Kent ME4 4TB, United Kingdom*

19 <sup>f</sup>*Division of Immunology, International Institute of Infection and Immunity, Shantou*  
20 *University Medical College, Shantou, Guangdong, People`s Republic of China*

21 <sup>g</sup>*Department of Microbiology and Immunology, Dalhousie University, Halifax, Canada*

22  
23 Running Head: Cross-protective immunity through sequential flu vaccination

24  
25 #Address correspondence to Anke Huckriede [a.l.w.huckriede@umcg.nl](mailto:a.l.w.huckriede@umcg.nl)

26 \*Present address: Kate Guilfoyle, Viroclinics Biosciences B.V., Rotterdam, The Netherlands

27

28 **Abstract**

29 Sequential infection with antigenically distinct influenza viruses induces cross-protective  
30 immune responses against heterologous virus strains in animal models. Here we investigated  
31 whether sequential immunization with antigenically distinct influenza vaccines can also  
32 provide cross-protection. To this end, we compared immune responses and protective  
33 potential against challenge with A(H1N1)pdm09 in mice infected sequentially with seasonal  
34 A(H1N1) virus followed by A(H3N2) virus or immunized sequentially with whole inactivated  
35 virus (WIV) or subunit (SU) vaccine derived from these viruses. Sequential infection provided  
36 solid cross-protection against A(H1N1)pdm09 infection while sequential vaccination with WIV,  
37 though not capable of preventing weight loss upon infection completely, protected the mice  
38 from reaching the humane endpoint. In contrast, sequential SU vaccination did not prevent  
39 rapid and extensive weight loss. Protection correlated with levels of cross-reactive but non-  
40 neutralizing antibodies of the IgG2a subclass, general increase of memory T cells and induction  
41 of influenza-specific CD4+ and CD8+ T cells. Adoptive serum transfer experiments revealed  
42 that despite lacking neutralizing activity, serum antibodies induced by sequential infection  
43 protected mice from weight loss and vigorous virus growth in the lungs upon A(H1N1)pdm09  
44 virus challenge. Antibodies induced by WIV vaccination alleviated symptoms but could not  
45 control virus growth in the lung. Depletion of T cells prior to challenge revealed that CD8+ T  
46 cells, but not CD4+ T cells, contributed to cross-protection. These results imply that sequential  
47 immunization with WIV but not SU derived from antigenically distinct viruses could alleviate  
48 the severity of infection caused by a pandemic and may improve protection to unpredictable  
49 seasonal infection.

50

## 51 **Importance**

52 New influenza virus strains entering the human population may have large impact and  
53 therefore their emergence requires immediate action. Yet, since these strains are  
54 unpredictable, vaccines cannot be prepared in advance, at least not as long as there is no  
55 universal or broadly protective influenza vaccine available. It is therefore important to  
56 elucidate in how far immunization strategies based on currently available seasonal vaccines  
57 can provide at least some protection against newly emerging virus strains. Moreover, insight  
58 in the possible mechanisms of protection can guide the further development of pre-pandemic  
59 immunization strategies. Our study presents a vaccination strategy based on sequential  
60 administration of readily available seasonal whole inactivated virus vaccines which could be  
61 easily applied in case of a new pandemic. In addition, our study identifies immune mechanisms,  
62 in particular cross-reactive non-neutralizing antibodies and CD8+ T cells, which should be  
63 targeted by broadly protective influenza vaccines.

64

65 **Keywords:** sequential vaccination, cross-protection, antigenically distinct influenza virus,  
66 immune mechanism, non-neutralizing antibody

67

## 68 **Introduction**

69 Influenza A virus (IAV) infections remain a worldwide public health threat. Influenza  
70 vaccination is the most reliable strategy to control annual epidemics and irregular pandemics  
71 [1]. Current inactivated influenza vaccines (IIV) primarily induce strain-specific antibodies  
72 against the two major virus surface proteins, hemagglutinin (HA) and neuraminidase (NA).  
73 However, these strain-specific antibodies cannot provide protection against antigenically  
74 drifted and antigenically shifted strains. When a pandemic strain emerges, it takes around six  
75 months to develop and distribute a new vaccine[2], which is too late for a vaccine to provide  
76 effective protection during the first pandemic wave. Thus, a cross-protective vaccine that  
77 could provide immediate protection against unpredicted influenza virus strains is urgently  
78 needed.

79 Live virus infection has been shown to provide some degree of cross-protection against  
80 A(H1N1)pdm09 infection in animal models[3][4][5][6][7][8] and in humans[9][10]. However,  
81 the exact mechanisms involved in cross-protection remain elusive. Cross-reactive antibodies  
82 against conserved regions of viral proteins, such as the HA stalk, the M2 ectodomain (M2e)  
83 and NP, induced by (sequential) live virus infection, correlate with cross-  
84 protection[3][11][12][13]. Some anti-HA stalk antibodies can directly neutralize influenza virus  
85 particles *in vitro*[14]. However, most of these antibodies target antigens that are expressed  
86 on the surface of infected cells and then provide cross-protection via a Fc receptor dependent  
87 mechanism[14][15][16].

88 Besides antibody responses, cross-reactive T cells induced by live virus infection have also  
89 been demonstrated to correlate with cross-protection[6][17][18]. Cytotoxic CD8 T cells can  
90 recognize internal, conserved epitopes across different virus strains. In animal models, CD8 T

91 cells induced by live virus infection have been shown to prevent A(H5N1) or A(H1N1)pdm09  
92 virus infection[19]. On the other hand, CD4 T cells specific for conserved epitopes have also  
93 been shown to provide protection against A(H1N1)pdm09 in mice[20][21]. These CD4 T cells  
94 could provide cross-protection through different mechanisms, including help for B cells, help  
95 for CD8 T cells and direct cytotoxic activity (reviewed in [22]). Furthermore, it has been  
96 demonstrated in humans that the presence of memory cross-reactive CD4 or CD8 T cells is  
97 correlated with cross-protection against A(H1N1)pdm09 or A(H7N9) virus infection[9][23][24].

98 Vaccination with trivalent inactivated influenza vaccine (IIV) did not provide protection against  
99 A(H1N1)pdm09 virus infection and was even found to be associated with enhanced disease in  
100 observational studies from Canada in humans[25][26][27][28][29]. In animal models,  
101 published studies indicate that vaccination with IIV could induce detectable levels of cross-  
102 reactive antibody against A(H1N1)pdm09 virus, yet, no cross-protection was  
103 observed[30][31][32]. The exception is a recent study showing that non-neutralizing antibody  
104 induced by IIV could cause activation of influenza-specific CD8 T cells by promoting antigen  
105 presentation[33]. If a broader immune response could be induced by the currently available  
106 influenza vaccines, it would benefit humans against novel virus infection.

107 Compared with a single virus infection, sequential infection with antigenically distinct live  
108 viruses was found to provide broader cross-protection[7][8][11]. This is because the second  
109 infection can cause a quick recall immune response to epitopes shared between the two  
110 viruses. It has been shown that sequential influenza virus infection can boost antibody  
111 responses to the shared HA stalk region[11][34].

112 Sequential immunization with antigenically distinct vaccines has also been used as a strategy  
113 to induce a broader immune response against influenza virus in animal models[35]. However,

114 most of these studies were focused on the cross-protective immune response induced by  
115 genetically modified vaccines[36][37][38][39]. Little is known about the protective potential  
116 of sequential immunization with conventional inactivated vaccines derived from different  
117 seasonal influenza virus strains. In case of a pandemic, such a vaccination strategy could be a  
118 first means of intervention until a pandemic vaccine becomes available.

119 In this study, we assessed the cross-protective immune responses induced by sequential  
120 infection with A(H1N1) and A(H3N2) virus, or sequential immunization with whole inactivated  
121 virus (WIV) or subunit (SU) vaccine derived from these viruses in a mouse model. Sequential  
122 infection provided robust cross-protection which was mediated by non-neutralizing, cross-  
123 reactive antibody and CD8 effector memory T cells (TEM). Partial cross-protection was  
124 provided by sequential vaccination with WIV and was associated with CD8 central memory T  
125 cells (TCM), and to a minor extent, with cross-reactive antibodies. In contrast, sequential  
126 vaccination with SU vaccine induced low levels of cross-reactive serum antibodies and no T  
127 cell immunity against A(H1N1)pdm09, and did not provide cross-protection. These results  
128 imply that in case of a new pandemic, sequential immunization with WIV but not subunit  
129 vaccines derived from different seasonal virus strains could mitigate disease severity until a  
130 pandemic vaccine becomes available.

131

## 132 **Materials and Methods**

### 133 **Virus and vaccines**

134 Influenza virus strains A/Puerto Rico/8/34 (H1N1)(PR8), X-31, a reassortant virus derived from  
135 A/Aichi/68 (H3N2), and A/California/07/2009 (H1N1)pdm09 were grown in embryonated  
136 chicken eggs, and the virus preparations were titrated on MDCK cells and in mice. Whole  
137 inactivated virus vaccines was produced from PR8, X31 and X-181 (HA and NA proteins from  
138 A/California/7/2009 (H1N1)pdm09 and internal proteins from PR8) by treatment with  $\beta$ -  
139 propiolactone. PR8 subunit (SU) vaccine and X-31 SU were prepared from PR8 and X-31 WIV,  
140 respectively, as described before [40].

### 141 **Vaccination, challenge and sample collection**

142 Female 6-8 weeks old CB6F1 mice) were purchased from Envigo, The Netherlands, and rested  
143 for at least one week. Mice were housed under SPF conditions in standard polycarbonate  
144 cages (5 animals per cage) with standard rodent bedding and cardboard cylinders as cage  
145 enrichment. Prior to the start of the experiment, animals were randomly allocated to the  
146 different treatment groups. All animal experiments were approved by the Central Committee  
147 for Animal Experiments CCD of the Netherlands (AVD105002016599). All experimental  
148 protocols were approved by the Animal Ethics Committee of the University Medical Center  
149 Groningen. Group sizes were determined using Piface software such that a power of at least  
150 80% was reached.

151 Naive mice (n = 15) were immunized intramuscularly (i.m.) with 15  $\mu$ g of PR8 WIV (containing  
152 around 5  $\mu$ g of HA) or 5  $\mu$ g of PR8 SU vaccine. Alternatively, mice were anesthetized and  
153 infected intranasally (i.n.) with a sublethal dose ( $10^3$  TCID<sub>50</sub>) of PR8 virus (live virus = LV). Four  
154 weeks after immunization or infection, mice were i.m. immunized with 15  $\mu$ g of X-31 WIV or

155 5 µg of X-31 SU or i.n. infected with a sublethal dose of ( $10^3$  TCID<sub>50</sub>) X-31 virus. Mice injected  
156 twice with PBS i.m. with 28 days interval served as negative control (Table 1).

157

158 Table 1. Experimental design for mouse experiment

| <b>Groups</b> | <b>First immunization<br/>(Day 0)</b> | <b>Second immunization<br/>(Day 28)</b> | <b>Challenge<br/>(D56)</b> |
|---------------|---------------------------------------|-----------------------------------------|----------------------------|
| 1             | PR8 WIV                               | X-31 WIV                                | H1N1pdm09                  |
| 2             | PR8 SU                                | X-31 SU                                 |                            |
| 3             | PR8 LV*                               | X-31 LV                                 |                            |
| 4             | PBS                                   | PBS                                     |                            |

159 \*LV = live virus

160

161 Four weeks after the second infection or immunization, 5 mice of each group were sacrificed  
162 for determination of infection- or vaccine-induced immune responses. The other 10 mice were  
163 anesthetized with isoflurane and challenged i.n. with  $10^{4.4}$  TCID<sub>50</sub> of A/California/7/2009  
164 H1N1pdm09 in 40 µl PBS. Three days post infection, 5 mice were sacrificed for determination  
165 of immune responses and lung virus titers. The remaining 5 mice were monitored daily for  
166 body weight loss for two weeks. Body weight loss exceeding 20% was considered as humane  
167 endpoint.

168 On day 0 (before challenge) and day 3 post challenge, mice (n = 5 from each group) were  
169 sacrificed under isoflurane anesthesia. Serum, nose wash and bronchoalveolar lavage (BAL)



170 were collected for further analysis. Lungs were perfused with 20 ml PBS containing 0.1%  
171 heparin through the heart right ventricle. Right lung lobes were collected, homogenized, snap-  
172 frozen and stored at -80°C for virus titration. The whole lung (day 0) or the left lung lobes (day  
173 3) and the spleens were collected for lymphocyte isolation.

#### 174 **Viral titer in lung**

175 Lung tissue collected on day 3 post-challenge was weighed, homogenized in 1 ml of Episerf  
176 medium (Thermo Fisher Scientific) and then centrifuged at 1200 rpm for 10 minutes.  
177 Supernatants were collected, aliquoted, snap-frozen and stored at -80°C until use. Lung virus  
178 titers were determined by infection of MDCK cells in 96-well plates with serial dilutions of the  
179 lung supernatants as described before[40]. Viral titers, presented as log<sub>10</sub> titer of 50% tissue  
180 culture infectious dose per gram lung (log<sub>10</sub>TCID<sub>50</sub>/g), were calculated based on the Reed-  
181 Muench method[41].

#### 182 **Isolation of lymphocytes from lung and spleen**

183 Spleens were homogenized in complete IMDM (with 10% FBS, 1% Penicillin-Streptomycin and  
184 0.1% β-mercaptoethanol) using a GentleMACS dissociator (Miltenyi Biotec B, Leiden, The  
185 Netherlands). Cell suspensions were then forced through a cell strainer (BD Bioscience, Breda,  
186 The Netherlands) and treated with ACK lysis buffer (0.15 M NH<sub>4</sub>Cl, 10 mM KHCO<sub>3</sub>, 0.1 mM  
187 EDTA, pH 7.2) to remove erythrocytes.

188 PBS-perfused lungs for isolation of lymphocytes were homogenized using a GentleMACS  
189 dissociator (Miltenyi Biotec) and then digested by treatment with collagenase D (0.5 mg/lung)  
190 (Roche, Woerden, The Netherlands) in DMEM medium supplemented with 2% FBS at 37°C for  
191 1.5 hour. The cell suspension was passed through a cell strainer. Lung lymphocytes in the  
192 filtered suspensions were enriched using lymphocyte density gradients (Sanbio, Uden, The

193 Netherlands) according to the manufacturer`s protocol. The concentration of Granzyme B in  
194 lung homogenates was determined using Granzyme B Ready-SET Go ELISA kit (eBioscience)  
195 according to the manufacturer`s protocol.

## 196 **ELISA**

197 For the detection of IgG, IgG1, IgG2a or IgA antibody against A(H1N1)pdm09 virus in serum  
198 and nasal wash, ELISA plates (Greiner, Alphen a/d Rijn, Netherlands) were coated with 0.3  
199 µg/well of X-181 WIV, conserved M2e peptide (SLLTEVETPIRNEWGSRSDSSD) or NP protein  
200 overnight at 37°C and ELISA assays were performed as described before[40]. For NA-specific  
201 ELISA, recombinant NA protein of A(H1N1)pdm09 was expressed and purified as described  
202 previously[42]. ELISA plates were coated with 0.1 µg/well of NA overnight at 4 °C and assays  
203 were performed as described[40].

## 204 **Pseudotype HA stalk neutralization assay**

205 Pseudotyped viruses (PV) were produced by co-transfection of HEK293T/17 cells using the  
206 polyethylenimine transfection reagent (Sigma, cat: 408727). Lentiviral packaging plasmid  
207 p8.91 and vector pCSFLW bearing the luciferase reporter were transfected alongside the  
208 relevant HA glycoprotein genes in the plasmid pl.18 [43]. Parental PV were produced bearing  
209 the HA of A/California/7/09 (H1), or A/duck/Memphis/546/1974 (H11). A chimeric HA (cHA)  
210 consisting of the stalk from A/California/7/09 (H1) and head from A/duck/Memphis/546/1974  
211 (H11) was also produced[44]. Pseudotype based microneutralisation assays (pMN) were  
212 performed as described previously [43]. Briefly, serial dilutions of serum were incubated with  
213  $1 \times 10^6$  relative luminescence units (RLU) of HA bearing PV per well on a 96-well white plate for  
214 1h at 37°C 5% CO<sub>2</sub> in a humidified incubator.  $1.5 \times 10^4$  HEK293T/17 cells were then added per  
215 well and plates incubated at 37°C 5% CO<sub>2</sub> for 48h before addition of Bright-Glo™ reagent

216 (Promega) and measurement of luciferase activity. Analysis was performed using Graph-Pad  
217 Prism. Stalk-directed antibody presence was measured via antibody titers recorded against  
218 the cHA and both of its parental strains (H11 and H1 PV). No (or negligible) antibodies should  
219 be present against the exotic H11 HA, restricting neutralisation of the cHA PV to antibodies  
220 directed against the conserved H1 stalk of the cHA. Control antibodies used included mAb  
221 CR6261 (Crucell, Johnson and Johnson) and polyclonal antiserum Anti H11N9 (NIBSC).

### 222 **Intracellular cytokine staining**

223 For IFN $\gamma$  intracellular cytokine staining, lymphocytes ( $1.5-2 \times 10^6$ ) from lung or spleen in  
224 complete IMDM medium were stimulated with CD28 (1  $\mu$ g/ml, eBioscience), with or without  
225 X-181 WIV (10  $\mu$ g/ml), overnight at 37°C in a 5% CO $_2$  incubator. Protein transport inhibitor  
226 cocktail (eBioscience) was added for the last 4 hours of stimulation. Stimulated cells were  
227 stained with fluorochrome conjugated antibodies, including Alexa Fluor 700-antiCD3 (clone  
228 17A2), FITC-antiCD4 (GK1.5), PerCP-cy5.5-antiCD8 $\alpha$  (53-6.7), eFlour 450-antiCD62L (MEL-14),  
229 APC-antiCD44 (IM7) for 45 minutes. After surface staining, cells were stained with Fixable  
230 Viability Dye eFlour 780 (eBioscience) to identify dead cells. Cells were then fixed with IC  
231 fixation buffer (eBioscience) and permeabilized with permeabilization buffer (eBioscience)  
232 before intracellular staining with PE-cy7-antiIFN $\gamma$  (clone XMG1.2) (all monoclonal antibodies  
233 from eBioscience). Samples were acquired on a BD LSRII and data were analyzed by Kaluza<sup>®</sup>  
234 Flow Cytometry Analysis Software.

### 235 **ELISPOT and tetramer staining**

236 Influenza NP-specific IFN $\gamma$ -producing T cells were enumerated using a commercial mouse IFN $\gamma$   
237 ELISpot kit (MABTEC, The Netherlands) according to the manufacturer's protocol. Briefly,  
238 splenocytes ( $2.5 \times 10^5$ /well) collected on day 0 post-infection were incubated with or without

239 5 µg/ml of the PR8 NP<sub>366-374</sub> epitope (ASNENMDAM) in a pre-coated 96-well plate. After  
240 overnight incubation, IFN $\gamma$ -producing T cells were detected using alkaline phosphatase-  
241 conjugated anti-mouse IFN $\gamma$  antibody. Spots were developed with BCIP/NBT substrate and  
242 counted with an AID Elispot reader (Autoimmune Diagnostika GmbH, Strassberg, Germany).  
243 The number of antigen-specific IFN $\gamma$ -producing cells was calculated by subtracting the number  
244 of spots detected in the unstimulated samples from the number in stimulated samples.  
245 Tetramer staining for lung samples was performed as follows: isolated lung lymphocytes were  
246 incubated with A(H1N1)pdm09 NP<sub>366-374</sub>-tetramer-PE (containing the A(H1N1)pdm09 epitope  
247 ASNENMETM) for 40 min and then stained with mouse anti-CD8 $\alpha$ -PerCP-cy5.5 antibody for  
248 40 min. Samples were acquired on a FACS Calibur<sup>TM</sup> BD II flow cytometer. Data were analyzed  
249 by Kaluza<sup>®</sup> Flow Cytometry Analysis Software.

#### 250 **Serum adoptive transfer**

251 Mice were sequentially infected or sequentially immunized with WIV as described above and  
252 serum was collected on day 28 post second infection or immunization. Serum collected from  
253 mice that were immunized twice i.m. with A(H1N1)pdm09 WIV served as positive control.  
254 Pooled serum was tested by ELISA for presence of anti-A(H1N1)pdm09 antibodies. Naive mice  
255 (n = 5/group) received 200 µl of pooled serum by intraperitoneal injection one day before  
256 challenge with A(H1N1)pdm09 virus. On day 6 post challenge, lungs were collected for virus  
257 titration.

#### 258 **CD4 and CD8 T cell depletion *in vivo***

259 For the T cell depletion study, mice were infected or vaccinated as described above and rested  
260 for 28 days. Groups of mice (n = 6/group) were injected with anti-CD4 T cell depletion antibody  
261 (200 µg/injection, GK1.5) or anti-CD8 T cell (200 µg/injection, YTS169). These antibodies were

262 given i.p on day -1, 1 and 3 of A(H1N1)pdm09 virus ( $10^{4.4}$  TCID<sub>50</sub>) challenge. On day 6 post  
263 challenge, lungs were collected for virus titration. Spleens were collected to confirm the  
264 depletion of T cells.

## 265 **Statistics**

266 Mann-Whitney U test was used to determine the differences between read-outs of two  
267 different groups. Statistical analyses were performed using GraphPad Prism version 6.01 for  
268 Windows. GraphPad Software, La Jolla, California, USA [www.graphpad.com](http://www.graphpad.com). P < 0.05, 0.01,  
269 0.001 were considered as significantly different and were denoted by \*, \*\*, \*\*\*, individually.

270

## 271 **Results**

### 272 **Sequential infection, WIV and SU vaccination show different levels of cross-protective** 273 **capacity against H1N1pdm09 influenza virus infection**

274 To investigate the cross-protective immune response induced by sequential infection or  
275 vaccination with antigens from different influenza virus strains, we sequentially infected mice  
276 with PR8 and X-31 influenza virus or sequentially vaccinated mice with WIV or SU vaccines  
277 derived from these viruses. These viral strains were selected to reflect a heterosubtypic  
278 exposure history in humans. The cross-protective capacity of sequential infection or  
279 sequential immunization was determined by challenging the mice with virus  
280 A/California/7/2009 (H1N1)pdm09.

281 After A(H1N1)pdm09 virus challenge, mice in the sequential SU vaccination group showed  
282 similar weight loss as mice in the PBS control group and developed severe symptoms,  
283 necessitating euthanasia on day 6 or 7 post challenge (Fig. 1 A, B). Mice that were sequentially  
284 vaccinated with WIV showed a similar trend of weight loss as mice in the PBS control group

285 until day 6 post infection. Yet, from day 7 post infection onwards, WIV immunized mice  
286 recovered and none of the mice reached the humane endpoint. In the sequential infection  
287 group, mice showed no or only minor weight loss after challenge and none of them needed to  
288 be sacrificed.

289 On day 3 post-challenge, lung virus titers in the sequential SU vaccination group did not differ  
290 significantly from those in the PBS control group (Fig. 1C). In the sequential WIV vaccination  
291 group, lung virus titers were decreased by 0.9  $\log_{10}$  as compared to the PBS group ( $p = 0.03$ ).  
292 Sequential infection resulted in a significant decrease of the lung virus titer by 2  $\log_{10}$  relative  
293 to the control group ( $p = 0.015$ ).

294 These data demonstrate that sequential immunization with WIV, although being less effective  
295 than sequential infection with live virus, provided a certain level of cross-protection against  
296 heterologous infection. In contrast, sequential SU vaccination did not provide cross-  
297 protection.

### 298 **Sequential infection, WIV and SU vaccination induce distinct cross-reactive antibody** 299 **immune responses**

300 To explore the immune mechanisms involved in protection from weight loss and lung virus  
301 growth upon challenge, A(H1N1)pdm09 cross-reactive antibody responses induced by  
302 sequential infection with PR8 and X-31 or immunization with PR8 and X-31 derived vaccines  
303 were determined.

304 Sequential infection induced around 20 times more cross-reactive IgG antibody than  
305 sequential WIV vaccination and approximately 75 times more cross-reactive IgG antibody than  
306 sequential SU vaccination ( $p < 0.0001$ ) (Fig. 2A). With respect to the subtype profile of the IgG  
307 antibodies, sequential infection and WIV vaccination induced a Th1-type antibody response.

308 The average ratio of serum IgG2a to IgG1 concentration was 3 for mice sequentially infected  
309 by live virus, compared with 1.5 induced by sequential WIV vaccination. In contrast, sequential  
310 SU vaccination induced a similar amount of IgG1 antibody as induced by sequential WIV  
311 vaccination but no IgG2a (Fig. 2B). However, cross-reactive antibodies, irrespective of whether  
312 induced by sequential infection or immunization, did not neutralize A(H1N1)pdm09 virus (Fig.  
313 2C). With respect to mucosal antibodies, only sequential infection was found to induce cross-  
314 reactive IgA antibody against A(H1N1)pdm09 virus in the nose (Fig. 2D).

315 In order to reveal the target protein(s) of the observed cross-reactive antibodies we first  
316 performed a pseudovirus-based assay to detect antibodies to the HA stalk domain. This assay  
317 uses a chimeric HA as antigen, with an H11 globular head, and an H1 stalk. The chimeric HA  
318 pseudovirus particles were effectively neutralized by the CR6261 mAb control which binds to  
319 the H1 stalk. However, no antibodies reacting with the H1 stalk were observed in any of the  
320 experimental groups (data not shown). Next, we examined anti-NA antibodies against  
321 A(H1N1)pdm09 virus. The mice from the sequential infection group and 4 out of 5 mice from  
322 the WIV vaccination group developed anti-NA antibodies, while only 2 out of 5 mice from the  
323 sequential SU vaccination group did so and levels of anti-NA antibody were low (Fig. 3A). Next,  
324 anti-M2e antibody titers were determined by coating conserved M2e peptide onto 96-well  
325 ELISA plate. Anti-M2e antibodies were only found in the sequential infection group (Fig. 3B).  
326 We also analyzed the presence of cross-reactive antibodies against conserved internal  
327 proteins in serum using recombinant NP from HK68 (H3N2), which shows 90% of sequence  
328 homology with NP from A(H1N1)pdm09. Sequential infection and WIV vaccination induced  
329 similar though somewhat variable amounts of anti-NP antibodies (Fig. 3C). As expected, no  
330 anti-NP antibody was found in the sequential SU vaccination group.

331 These data indicate that sequential infection induced broader and higher amounts of cross-  
332 reactive non-neutralizing antibodies than sequential WIV vaccination, while SU vaccination  
333 induced only antibodies against hemagglutinin and to a limited extent against neuraminidase.  
334 Moreover, responses to live virus and WIV were dominated by IgG2a while responses to SU  
335 consisted exclusively of IgG1 antibodies.

### 336 **Sequential infection, WIV and SU vaccination induce different memory T cell immune** 337 **response**

338 Apart from cross-reactive antibody response, cellular immune responses also play an  
339 important role in cross-protection. We first evaluated the overall memory T cell responses in  
340 spleen and lungs from mice after sequential infections or vaccinations. None of these  
341 immunization strategies could significantly enhance the number of memory CD4+CD44+ T  
342 cells ( $p = 0.28$ ) (Fig. 4A). However, numbers of memory CD8+CD44+ T cells were significantly  
343 enhanced in spleen ( $p = 0.028$ ) and lung ( $p = 0.015$ ) of sequentially infected mice compared  
344 with mice of the unvaccinated group (Fig. 4B). Also, sequential WIV vaccination enhanced  
345 memory CD8+CD44+ T cell numbers, however, only in spleen was significance reached ( $p =$   
346  $0.02$ ) (Fig. 4B). No increase in the number of memory CD8 T cells was found in the sequential  
347 SU vaccination group. Interestingly, while the CD8 memory T cell population in sequentially  
348 infected mice consisted of CD62L negative TEM as well as CD62L positive TCM, the majority of  
349 memory CD8 T cells from the sequential WIV vaccination group was CD62L positive (Fig. 4C).  
350 These data indicate that sequential infection and sequential immunization with WIV are  
351 capable of stimulating CD8 memory responses while immunization with SU is not.

352 For detection of influenza specific T cells, splenocytes from sequentially infected or  
353 sequentially immunized mice were stimulated overnight with WIV, and IFN $\gamma$  production was



354 assessed by intracellular cytokine staining. In live virus infected mice, percentages of IFN $\gamma$   
355 producing CD4 $^{+}$  and CD8 $^{+}$  memory T cells in spleen and lung were significantly higher than in  
356 mock immunized mice (Fig. 5A,  $p < 0.05$ ). Moreover, around 90% of these IFN $\gamma$ -producing CD8  
357 T cells were effector memory cells (data not shown). Also in WIV immunized mice, enhanced  
358 percentages of IFN $\gamma$  positive CD4 $^{+}$  and CD8 $^{+}$  memory T cells were found, yet lower than in the  
359 LV group. Significance as compared to PBS control animals was reached only for CD4 $^{+}$  T cells  
360 in spleen.

361 The influenza-specific CD8 T cells induced by infection or immunization were also enumerated  
362 by ELISPOT after stimulation of splenocytes with NP<sub>366-374</sub> peptide (ASNENMDAM) from PR8  
363 virus (the epitope presents in PR8 as well as X-31 virus). NP-specific CD8 T cells were detected  
364 in the WIV and the sequential infection group, but numbers were around 12 times higher in  
365 the latter (Fig. 5B,  $p = 0.008$ ). Next, we assessed the cross-reactivity of these NP-specific CD8  
366 T cells to A(H1N1)pdm09 NP by staining with tetramers containing the ASENENMETM epitope  
367 (from A(H1N1)pdm09 virus). No tetramer positive CD8 T cells were observed in these groups  
368 of mice (Fig. 5C) while tetramer positive cells were readily detected in blood of mice infected  
369 with A(H1N1)pdm09 virus.

370 **Serum antibodies induced by sequential infection are sufficient to provide cross-protection**  
371 **but antibodies induced by WIV vaccination are not**

372 Our data show that sequential infection and sequential immunization with WIV could provide  
373 protection against severe symptoms upon infection with an A(H1N1)pdm09 virus. To  
374 determine the contribution of cross-reactive antibodies against A(H1N1)pdm09 virus  
375 challenge, serum from sequentially virus infected, WIV vaccinated or PBS control mice was  
376 passively transferred to naive mice one day before A(H1N1)pdm09 virus challenge. Serum

377 from mice vaccinated with WIV derived from A(H1N1)pdm09 virus served as positive control.  
378 Mice receiving serum from mice immunized with A(H1N1)pdm09 WIV (positive control,  
379 neutralizing titer 330) via adoptive transfer did not show weight loss upon A(H1N1)pdm09  
380 virus challenge (Fig. 6A) and lung virus titers in these animals were decreased by more than 2  
381 logs compared to the titers in the PBS control group (Fig. 6B,  $p < 0.01$ ). Similarly, mice receiving  
382 serum from the sequential infection group showed no or only mild weight loss. Interestingly,  
383 despite the fact that the transferred serum did not contain any neutralizing antibodies, lung  
384 virus titers in this group were decreased to the same low level as in mice which had received  
385 serum from A(H1N1)pdm09-immunized mice containing neutralizing antibodies. Also serum  
386 from the sequential WIV vaccination group provided partial protection; 4 out of 5 mice  
387 receiving this serum showed no or mild weight loss, while one mouse went down quickly. Yet,  
388 lung virus titers in the WIV vaccination group, though slightly lower, did not differ significantly  
389 from those in PBS-treated controls ( $p = 0.22$ ) (Fig. 6B).

390 These data indicate that non-neutralizing antibodies induced by sequential infection were as  
391 effective as neutralizing antibodies induced by A(H1N1)pdm09 WIV vaccination in providing  
392 protection against A(H1N1)pdm09 virus challenge. However, non-neutralizing antibody  
393 induced by sequential WIV vaccination were not sufficient to provide full cross-protection.

#### 394 **Memory T cells induced by sequential live virus infection or WIV vaccination are involved in** 395 **cross-protection against A(H1N1)pdm09 virus challenge**

396 To determine the contribution of T cell immune responses to cross-protection against  
397 A(H1N1)pdm09 virus infection, we used CD4 or CD8 specific antibodies to deplete T cells  
398 before and during A(H1N1)pdm09 challenge. On day 6 post-challenge, we confirmed that 95%  
399 of CD8 T cells or 96% of CD4 T cells in mice spleen were depleted by this treatment (data not

400 shown).

401 Mice in the PBS mock vaccination group, no matter whether treated with PBS, CD4 depletion  
402 antibody or CD8 depletion antibody, showed continuous weight loss after A(H1N1)pdm09  
403 challenge (Fig.6A, PBS) and displayed the same virus titers in lung tissue on day 6 post-  
404 infection (Fig. 6B, PBS). In contrast, mice in the sequential infection group were protected  
405 from weight loss and showed low or undetectable lung virus titers (Fig. 7A, LV). Depletion of  
406 CD4 T cells in these mice had no effect on protection. Depletion of CD8 T cells in the sequential  
407 infection group had some effect on protection from weight loss; on day 6 post A(H1N1)pdm09  
408 virus challenge 3 out of 6 mice had lost > 6.5 % weight while in non-depleted mice the most  
409 severe weight loss was 2.1% and was observed in a single mouse only (Fig. 7A, LV). In addition,  
410 lung virus titers were about 1.5 log<sub>10</sub> higher in the CD8-depleted mice than in non-depleted  
411 control mice of the sequential infection group; yet, virus titers were still significantly lower  
412 than in non-immunized mice. In the WIV vaccination group, depletion of CD4 or CD8 T cell did  
413 not significantly alter the weight loss compared with mock depletion but a strong trend  
414 towards less weight loss was observed in mice depleted for CD4 T cells as compared to non-  
415 depleted mice of this group (P = 0.054, Fig. 7A, WIV). Depletion of CD4 T cells decreased and  
416 depletion of CD8 T cells increased lung virus titers by about 1 log as compared to non-depleted  
417 animals on day 6 post challenge but these trends did not reach statistical significance (Fig. 7B,  
418 WIV). Moreover, virus titers in WIV-immunized CD8 T cell-depleted mice were of the same  
419 magnitude as those in the PBS mock vaccination group.

420 These data above suggests that CD4 memory T cells were most likely not involved in cross-  
421 protection while CD8 memory T cells induced by sequential infection or WIV immunization  
422 contributed decisively to cross-protection.

423 **Discussion**

424 To determine whether sequential immunization with antigenically distinct traditional vaccines  
425 could provide cross-protection, mice were sequentially immunized with WIV or SU vaccines  
426 derived from PR8 and X-31 viruses and then challenged with an A(H1N1)pdm09 virus. Another  
427 group of mice was sequentially infected with sublethal doses of PR8 followed by X-31 prior to  
428 A(H1N1)pdm09 virus challenge. We demonstrate that sequential infection provided solid  
429 cross-protection which was correlated with cross-protective antibodies and CD8 TEM cells.  
430 Sequential vaccination with WIV provided partial cross-protection which also correlated with  
431 induction of cross-reactive antibodies and CD8 T cells. Yet, sequential SU vaccination did not  
432 provide cross-protection.

433 Neither sequential infection nor sequential immunization resulted in induction of antibodies  
434 capable of neutralizing A(H1N1)pdm09 virus. Yet, substantial amounts of cross-reactive non-  
435 neutralizing antibodies were induced. Previous publications have shown that non-neutralizing  
436 antibodies, for example anti-HA stem antibodies, can be induced by sequential infection with  
437 antigenically distinct viruses and may provide cross-protection against A(H1N1)pdm09  
438 influenza virus infection[11][12]. In contrast to these findings, no anti-HA stem antibodies  
439 were found in this study. This may be due to the fact that the two virus strains (PR8 and X-31)  
440 used for infection/immunization belong to two different phylogenetic groups. The HA-stem  
441 regions from PR8 and X-31 virus show low similarity, which might have impaired boosting of  
442 HA-stem reactive B cells induced by PR8 through exposure to X-31. Nevertheless, we found  
443 cross-reactive antibodies against other conserved proteins in this study. Anti-M2e, anti-NP  
444 and anti-NA antibodies were induced by sequential infection and, although to a lesser extent,  
445 by sequential WIV immunization. In contrast, sequential SU immunization induced only very  
446 moderate amounts of anti-NA antibodies cross-reactive with A(H1N1)pdm09 virus.

447 Since no neutralizing antibodies were found, the cross-reactive but non-neutralizing  
448 antibodies likely are the reason for the cross-protection observed in the serum adoptive  
449 transfer experiment. Non-neutralizing antibodies can provide cross-protection via Fc receptor  
450 dependent mechanisms (reviewed in [45]). Interestingly, control of lung virus growth by non-  
451 neutralizing antibodies evoked by sequential infection with PR8 and X-31 was as effective as  
452 by neutralizing antibodies evoked by A(H1N1)pdm09 WIV. Even in absence of antigen-specific  
453 T cells, neutralizing antibodies are thus not crucial for protection, suggesting that non-  
454 neutralizing antibodies maybe more important for cross-protection than generally thought.  
455 Interestingly, recent studies revealed that in humans antibodies cross-reacting with different  
456 influenza virus strains are common and that these antibodies are effectively enhanced by  
457 vaccination with seasonal influenza vaccines[46][47].

458 Hillaire et al and Guo et al have shown that one dose of serum from virus-infected animals  
459 could not provide cross-protection against A(H1N1)pdm09 virus infection in mice[6][17], while  
460 Fang et al have shown that four doses of serum could provide cross-protection[3]. These  
461 studies imply that the amount of non-neutralizing cross-reactive antibodies may also play an  
462 important role in cross-protection. In the present study, cross-reactive antibody titers evoked  
463 by sequential WIV immunization were 20-fold lower than those evoked by sequential infection.  
464 We thus speculate that antibodies induced by WIV immunization, though in principle cross-  
465 protective as indicated by our data, were not present in sufficient amounts to confer complete  
466 protection.

467 Although sequential infection and sequential WIV immunization induced virus-specific IFN $\gamma$ -  
468 producing CD4 T cells, depletion of CD4 T cells in this study did not influence the cross-  
469 protection, neither in the sequential infection group nor in the sequential WIV vaccination

470 group. These results contrast with previous findings which indicate that CD4 T cells might play  
471 a role in cross-protection[22][6][17]. Hillaire et al reported that naïve mice that received T  
472 cells (a mixture of CD4 and CD8 T cells) induced by a single A(H3N2) (HK68) virus infection  
473 acquired better cross-protection against A(H1N1)pdm09 virus infection than naïve mice that  
474 received purified CD8 T cells only[6]. Another study by Guo et al reported that depletion of  
475 CD4 T cells induced by a single X-31 virus infection impaired the cross-protection against  
476 A(H1N1)pdm09 virus infection in mice[17]. In this study, not only CD4 T cells, but also robust  
477 cross-reactive antibodies and CD8 T cell immune responses were induced by sequential  
478 infection. These antibodies or CD8 T cells alone could significantly reduce the virus titer in  
479 mice lung in the absence of CD4 T cells. We conclude that CD4 T cell are not essential for cross-  
480 protection against A(H1N1)pdm09 during infection in this mouse model.

481 CD8 T cells play an important role in cross-protection. In the present study, depletion of CD8  
482 T cells induced by sequential WIV immunization resulted in lung virus titers similar to those in  
483 PBS mock vaccinated mice, implying that CD8 T cells are important for cross-protection  
484 induced by sequential WIV immunization. These results agree with those reported by Furuya  
485 et al who showed that WIV (prepared by  $\gamma$ -irradiation) did not provide cross-protection against  
486 heterologous virus infection in mice defective in CD8 T cells [48]. Another study by Budimir et  
487 al also has shown that depletion of CD8 T cells induced by 2 doses of WIV abolished the cross-  
488 protection against heterologous virus challenge[49]. Depletion of CD8 T cells in the sequential  
489 infection group prior to A(H1N1)pdm09 challenge had a significant though moderate effect on  
490 lung virus titers. This result implies that in the sequential infection group CD8 T cells do play a  
491 role in cross-protection, but team up with other mechanisms, eg antibodies (Fig. 5), to provide  
492 full protection. Our findings are also in line with previous publications which demonstrate that  
493 CD4 T cells or antibody immune responses are required to cooperate with CD8 T cells for

494 providing optimal cross-protection in live virus infected mice[18][17][50].

495 The tetramer experiment indicates that PR8 NP<sub>366-374</sub> epitope -specific CD8 T cells elicited by  
496 PR8 and boosted by X-31 virus or WIV could not recognize the corresponding A(H1N1)pdm09  
497 NP<sub>366-374</sub> epitope. This result is in line with previous findings demonstrating that X-31 NP<sub>366-374</sub>  
498 epitope cannot be recognized by A(H1N1)pdm09 NP-specific CD8 T cells[51]. However, Guo et  
499 al have reported that influenza NP and PA proteins from PR8 and A(H1N1)pdm09 virus share  
500 many conserved epitopes[51]. It is possible that influenza-specific CD8 T cells against these  
501 shared conserved epitopes induced by sequential infection or WIV immunization provided  
502 cross-protection against A(H1N1)pdm09 influenza virus infection.

503 Different phenotypes of memory CD8 T cells show different capacities in cross-protection, for  
504 example Wu et al have shown that CD8 TCM induced by influenza virus infection are not  
505 required for cross-protection[18]. In the present study, we found that sequential infection  
506 mainly induced CD8 TEM. This result is in line with previous findings in mice and humans  
507 reporting that a single influenza infection predominantly induces influenza-specific CD8 TEM  
508 cells[52][53]. CD8 TEM have been shown to be associated with a fast recall immune response  
509 to the infection site, thus providing immediate cross-protection[52]. Interestingly, we found  
510 that sequential WIV immunization was more likely to induce CD8 TCM. These cells have shown  
511 high proliferation ability in secondary lymphoid organs but to provide delayed cross-  
512 protection[54]. Thus, we propose that CD8 TEM in lung and spleen induced by sequential  
513 infection provided immediate local antiviral effects, resulting in solid cross-protection. In  
514 contrast, CD8 TCM in spleen induced by sequential WIV immunization provided delayed  
515 antiviral effects in the lung, resulting in partial cross-protection.

516 In summary, sequential infection with antigenically distinct viruses provided solid cross-

517 protection against A(H1N1)pdm09 virus infection. Yet, sequential immunization with  
518 antigenically distinct SU failed to provide cross-protection. Intriguingly, sequential  
519 immunization with antigenically distinct WIV provided partial cross-protection by a  
520 mechanism involving cross-reactive but non-neutralizing antibodies as well as CD8+ T cells.  
521 These results imply that sequential immunization with WIV prepared from antigenically  
522 distinct viruses could be used to alleviate the severity of virus infection if a new pandemic  
523 occurs.

## 524 **Acknowledgements**

525 The authors would like to thank Meiling Dai, Utrecht University, Utrecht, The Netherlands, for  
526 technical assistance and David A. Price, Institute of Infection and Immunity, Cardiff University  
527 School of Medicine, Cardiff, United Kingdom, for a gift of tetramers. This research was funded  
528 by the European Union Seventh Framework Program 19 (FP7/2007-2013) Universal Influenza  
529 Vaccines Secured (UNISEC) consortium under grant agreement no. 602012 and by the EU  
530 Horizon 2020 Program under the Marie Skłodowska-Curie grant agreement 713660. DW  
531 received a PhD scholarship from the University Medical Center Groningen, Groningen, The  
532 Netherlands, and Shantou University Medical College, Shantou, China.

533

## 534 **References**

- 535 [1] Wiersma L, Rimmelzwaan G, de Vries R. Developing Universal Influenza Vaccines:  
536 Hitting the Nail, Not Just on the Head. *Vaccines* 2015;3:239–62.  
537 doi:10.3390/vaccines3020239.
- 538 [2] Krammer F, Palese P. Advances in the development of influenza virus vaccines. *Nat*  
539 *Rev Drug Discov* 2015;14:167–82. doi:10.1038/nrd4529.
- 540 [3] Fang Y, Banner D, Kelvin A a, Huang SSH, Paige CJ, Corfe S a, et al. Seasonal H1N1



- 541 influenza virus infection induces cross-protective pandemic H1N1 virus immunity  
542 through a CD8-independent, B cell-dependent mechanism. *J Virol* 2012;86:2229–38.  
543 doi:10.1128/JVI.05540-11.
- 544 [4] O’Donnell CD, Wright A, Vogel LN, Wei C-J, Nabel GJ, Subbarao K. Effect of Priming  
545 with H1N1 Influenza Viruses of Variable Antigenic Distances on Challenge with 2009  
546 Pandemic H1N1 Virus. *J Virol* 2012;86:8625–33. doi:10.1128/JVI.00147-12.
- 547 [5] Guo H, Santiago F, Lambert K, Takimoto T, Topham DJ. T cell-mediated protection  
548 against lethal 2009 pandemic H1N1 influenza virus infection in a mouse model. *J Virol*  
549 2011;85:448–55. doi:10.1128/JVI.01812-10.
- 550 [6] Hillaire MLB, van Trierum SE, Kreijtz JHCM, Bodewes R, Geelhoed-Mieras MM,  
551 Nieuwkoop NJ, et al. Cross-protective immunity against influenza pH1N1 2009 viruses  
552 induced by seasonal influenza A (H3N2) virus is mediated by virus-specific T-cells. *J*  
553 *Gen Virol* 2011;92:2339–49. doi:10.1099/vir.0.033076-0.
- 554 [7] Carter DM, Bloom CE, Nascimento EJM, Marques ET a, Craigo JK, Cherry JL, et al.  
555 Sequential seasonal H1N1 influenza virus infections protect ferrets against novel 2009  
556 H1N1 influenza virus. *J Virol* 2013;87:1400–10. doi:10.1128/JVI.02257-12.
- 557 [8] Laurie KL, Carolan L a, Middleton D, Lowther S, Kelso A, Barr IG. Multiple infections  
558 with seasonal influenza A virus induce cross-protective immunity against A(H1N1)  
559 pandemic influenza virus in a ferret model. *J Infect Dis* 2010;202:1011–20.  
560 doi:10.1086/656188.
- 561 [9] Sridhar S, Begom S, Bermingham A, Hoschler K, Adamson W, Carman W, et al. Cellular  
562 immune correlates of protection against symptomatic pandemic influenza. *Nat Med*  
563 2013;19:1305–12. doi:10.1038/nm.3350.
- 564 [10] Hayward AC, Wang L, Goonetilleke N, Fragaszy EB, Bermingham A, Copas A, et al.  
565 Natural T cell-mediated protection against seasonal and pandemic influenza: Results  
566 of the flu watch cohort study. *Am J Respir Crit Care Med* 2015;191:1422–31.  
567 doi:10.1164/rccm.201411-1988OC.
- 568 [11] Kirchenbaum GA, Carter DM, Ross TM. Sequential Infection in Ferrets with  
569 Antigenically Distinct Seasonal H1N1 Influenza Boosts Hemagglutinin Stalk-Specific

- 570           Antibodies. *J Virol* 2015;90:1116–28. doi:10.1128/JVI.02372-15.
- 571   [12]   Margine I, Hai R, Albrecht RA, Obermoser G, Harrod AC, Banchereau J, et al. H3N2  
572           Influenza Virus Infection Induces Broadly Reactive Hemagglutinin Stalk Antibodies in  
573           Humans and Mice. *J Virol* 2013;87:4728–37. doi:10.1128/JVI.03509-12.
- 574   [13]   Couch RB, Atmar RL, Franco LM, Quarles JM, Wells J, Arden N, et al. Antibody  
575           correlates and predictors of immunity to naturally occurring influenza in humans and  
576           the importance of antibody to the neuraminidase. *J Infect Dis* 2013;207:974–81.  
577           doi:10.1093/infdis/jis935.
- 578   [14]   DiLillo DJ, Tan GS, Palese P, Ravetch J V. Broadly neutralizing hemagglutinin stalk-  
579           specific antibodies require FcγR interactions for protection against influenza virus in  
580           vivo. *Nat Med* 2014;20:143–51. doi:10.1038/nm.3443.
- 581   [15]   El Bakkouri K, Descamps F, De Filette M, Smet A, Festjens E, Birkett A, et al. Universal  
582           vaccine based on ectodomain of matrix protein 2 of influenza A: Fc receptors and  
583           alveolar macrophages mediate protection. *J Immunol* 2011;186:1022–31.  
584           doi:10.1016/j.ymed.2011.08.035.
- 585   [16]   LaMere MW, Lam H-T, Moquin A, Haynes L, Lund FE, Randall TD, et al. Contributions  
586           of antinucleoprotein IgG to heterosubtypic immunity against influenza virus. *J*  
587           *Immunol* 2011;186:4331–9. doi:10.4049/jimmunol.1003057.
- 588   [17]   Guo H, Santiago F, Lambert K, Takimoto T, Topham DJ. T cell-mediated protection  
589           against lethal 2009 pandemic H1N1 influenza virus infection in a mouse model. *J Virol*  
590           2011;85:448–55. doi:10.1128/JVI.01812-10.
- 591   [18]   Wu T, Hu Y, Lee Y-T, Bouchard KR, Benechet A, Khanna K, et al. Lung-resident memory  
592           CD8 T cells (TRM) are indispensable for optimal cross-protection against pulmonary  
593           virus infection. *J Leukoc Biol* 2014;95:215–24. doi:10.1189/jlb.0313180.
- 594   [19]   Kreijtz JHCM, Bodewes R, van den Brand JM a, de Mutsert G, Baas C, van Amerongen  
595           G, et al. Infection of mice with a human influenza A/H3N2 virus induces protective  
596           immunity against lethal infection with influenza A/H5N1 virus. *Vaccine* 2009;27:4983–  
597           9. doi:10.1016/j.vaccine.2009.05.079.

- 598 [20] Alam S, Sant AJ. Infection with seasonal influenza virus elicits CD4 T cells specific for  
599 genetically conserved epitopes that can be rapidly mobilized for protective immunity  
600 to pandemic H1N1 influenza virus. *J Virol* 2011;85:13310–21. doi:10.1128/JVI.05728-  
601 11.
- 602 [21] Wenzel UA, Bernasconi V, Bemark M, Kolpe A, Eliasson DG, Omokanye A, et al. M2e-  
603 tetramer-specific memory CD4 T cells are broadly protective against influenza  
604 infection 2017:1–17. doi:10.1038/mi.2017.14.
- 605 [22] Swain SL, McKinstry KK, Strutt TM. Expanding roles for CD4+ T cells in immunity to  
606 viruses. *Nat Rev Immunol* 2012;12:136–48. doi:10.1038/nri3152.
- 607 [23] Wang Z, Wan Y, Qiu C, Quiñones-Parra S, Zhu Z, Loh L, et al. Recovery from severe  
608 H7N9 disease is associated with diverse response mechanisms dominated by CD8+ T  
609 cells. *Nat Commun* 2015;6:6833. doi:10.1038/ncomms7833.
- 610 [24] Wilkinson TM, Li CKF, Chui CSC, Huang AKY, Perkins M, Liebner JC, et al. Preexisting  
611 influenza-specific CD4+ T cells correlate with disease protection against influenza  
612 challenge in humans. *Nat Med* 2012;18:274–80. doi:10.1038/nm.2612.
- 613 [25] Jefferies S, Earl D, Berry N, Blackmore T, Rooker S, Raymond N, et al. Effectiveness of  
614 the 2009 seasonal influenza vaccine against pandemic influenza A ( H1N1 ) 2009 in  
615 healthcare workers in New Zealand , June-August 2009. *Euro Surveill* 2011;16.
- 616 [26] Hardelid P, Fleming DM, Mcmenamin J, Andrews N, Robertson C, Sebastian Pillai P, et  
617 al. Effectiveness of pandemic and seasonal influenza vaccine in preventing pandemic  
618 influenza A(H1N1)2009 infection in England and Scotland 2009-2010. *Eurosurveillance*  
619 2011;16:1–7.
- 620 [27] Hancock K, Veguilla V, Lu X, Zhong W, Butler EN, Sun H, et al. Cross-Reactive Antibody  
621 Responses to the 2009 Pandemic H1N1 Influenza Virus. *N Engl J Med* 2009;361:1945–  
622 52. doi:10.1056/NEJMoa0906453.
- 623 [28] Skowronski DM, de Serres G, Crowcroft NS, Janjua NZ, Boulianne N, Hottes TS, et al.  
624 Association between the 2008-09 seasonal influenza vaccine and pandemic H1N1  
625 illness during spring-summer 2009: Four observational studies from Canada. *PLoS*  
626 *Med* 2010;7. doi:10.1371/journal.pmed.1000258.

- 627 [29] Janjua NZ, Skowronski DM, Hottes TS, Osei W, Adams E, Petric M, et al. Seasonal  
628 influenza vaccine and increased risk of pandemic A/H1N1-related illness: first  
629 detection of the association in British Columbia, Canada. *Clin Infect Dis* 2010;51:1017–  
630 27. doi:10.1086/656586.
- 631 [30] Chen GL, Min J-Y, Lamirande EW, Santos C, Jin H, Kemble G, et al. Comparison of a live  
632 attenuated 2009 H1N1 vaccine with seasonal influenza vaccines against 2009  
633 pandemic H1N1 virus infection in mice and ferrets. *J Infect Dis* 2011;203:930–6.  
634 doi:10.1093/infdis/jiq144.
- 635 [31] Ellebedy AH, Ducatez MF, Duan S, Stigger-Rosser E, Rubrum AM, Govorkova EA, et al.  
636 Impact of prior seasonal influenza vaccination and infection on pandemic A (H1N1)  
637 influenza virus replication in ferrets. *Vaccine* 2011;29:3335–9.  
638 doi:10.1016/j.vaccine.2010.08.067.
- 639 [32] Pascua PNQ, Song M-S, Lee JH, Park KJ, Kwon H-I, Baek YH, et al. Evaluation of the  
640 efficacy and cross-protectivity of recent human and swine vaccines against the  
641 pandemic (H1N1) 2009 virus infection. *PLoS One* 2009;4:e8431.  
642 doi:10.1371/journal.pone.0008431.
- 643 [33] Kim JH, Reber AJ, Kumar A, Ramos P, Sica G, Music N, et al. Non-neutralizing  
644 antibodies induced by seasonal influenza vaccine prevent, not exacerbate  
645 A(H1N1)pdm09 disease. *Sci Rep* 2016;6:1–13. doi:10.1038/srep37341.
- 646 [34] Krammer F, Pica N, Hai R, Tan GS, Palese P. Hemagglutinin Stalk-Reactive Antibodies  
647 Are Boosted following Sequential Infection with Seasonal and Pandemic H1N1  
648 Influenza Virus in Mice. *J Virol* 2012;86:10302–7. doi:10.1128/JVI.01336-12.
- 649 [35] Krammer F. Strategies to induce broadly protective antibody responses to viral  
650 glycoproteins. *Expert Rev Vaccines* 2017;16:503–13.  
651 doi:10.1080/14760584.2017.1299576.
- 652 [36] Krammer F, Pica N, Hai R, Margine I, Palese P. Chimeric Hemagglutinin Influenza Virus  
653 Vaccine Constructs Elicit Broadly Protective Stalk-Specific Antibodies. *J Virol*  
654 2013;87:6542–50. doi:10.1128/JVI.00641-13.
- 655 [37] Wei C-J, Boyington JC, McTamney PM, Kong W-P, Pearce MB, Xu L, et al. Induction of

- 656 broadly neutralizing H1N1 influenza antibodies by vaccination. *Science*  
657 2010;329:1060–4. doi:10.1126/science.1192517.
- 658 [38] Ryder AB, Nachbagauer R, Buonocore L, Palese P, Krammer F, Rose JK. Vaccination  
659 with Vesicular Stomatitis Virus-Vectored Chimeric Hemagglutinins Protects Mice  
660 against Divergent Influenza Virus Challenge Strains. *J Virol* 2016;90:2544–50.  
661 doi:10.1128/JVI.02598-15.
- 662 [39] Zhou H, Huang Y, Yuan S, Li Y, Wu S, Xu J, et al. Sequential immunization with  
663 consensus influenza hemagglutinins raises cross-reactive neutralizing antibodies  
664 against various heterologous HA strains. *Vaccine* 2016:1–8.  
665 doi:10.1016/j.vaccine.2016.11.051.
- 666 [40] Liu H, Patil HP, de Vries-Idema J, Wilschut J, Huckriede A. Enhancement of the  
667 Immunogenicity and Protective Efficacy of a Mucosal Influenza Subunit Vaccine by the  
668 Saponin Adjuvant GPI-0100. *PLoS One* 2012;7. doi:10.1371/journal.pone.0052135.
- 669 [41] Press C. *the American. J Sociol* 2010;58:231–9.
- 670 [42] Dai M, Guo H, Dortmans JCFM, Dekkers J, Nordholm J, Daniels R. Identification of  
671 Residues That Affect Oligomerization and / or Enzymatic Activity of Influenza Virus  
672 H5N1 Neuraminidase Proteins 2016;90:9457–70. doi:10.1128/JVI.01346-16.Editor.
- 673 [43] Temperton NJ, Hoschler K, Major D, Nicolson C, Manvell R, Hien M. A sensitive  
674 retroviral pseudotype assay for influenza H5N1-neutralizing antibodies 2007:105–12.  
675 doi:10.1111/j.1750-2659.2007.00016.x.
- 676 [44] Ferrara F, Temperton N. MethodsX Chimeric influenza haemagglutinins : Generation  
677 and use in pseudotype neutralization assays. *MethodsX* 2017;4:11–24.  
678 doi:10.1016/j.mex.2016.12.001.
- 679 [45] Jegaskanda S, Vandervan HA, Wheatley AK, Stephen J. Fc or not Fc ; that is the  
680 question : Antibody Fc-receptor interactions are key to universal influenza vaccine  
681 design 2017;5515. doi:10.1080/21645515.2017.1290018.
- 682 [46] McCarthy KR, Watanabe A, Kuraoka M, Schmidt AG, Kelsoe G, Harrison SC, et al.  
683 Memory B Cells that Cross-React with Group 1 and Group 2 Influenza A Viruses Are

684 Abundant in Adult Human Repertoires Article Memory B Cells that Cross-React with  
685 Group 1 and Group 2 Influenza A Viruses Are Abundant in Adult Human Repertoires.  
686 *Immunity* 2018;48:174–183.e9. doi:10.1016/j.immuni.2017.12.009.

687 [47] Lee J, Boutz DR, Chromikova V, Joyce MG, Vollmers C, Leung K, et al. Molecular-level  
688 analysis of the serum antibody repertoire in young adults before and after seasonal  
689 influenza vaccination 2016. doi:10.1038/nm.4224.

690 [48] Furuya Y, Chan J, Regner M, Lobigs M, Koskinen A, Kok T, et al. Cytotoxic T cells are  
691 the predominant players providing cross-protective immunity induced by {gamma}-  
692 irradiated influenza A viruses. *J Virol* 2010;84:4212–21. doi:10.1128/JVI.02508-09.

693 [49] Budimir N, Huckriede A, Meijerhof T, Boon L, Gostick E, Price D a, et al. Induction of  
694 heterosubtypic cross-protection against influenza by a whole inactivated virus  
695 vaccine: the role of viral membrane fusion activity. *PLoS One* 2012;7:e30898.  
696 doi:10.1371/journal.pone.0030898.

697 [50] Laidlaw BJ, Decman V, Ali M-A a, Abt MC, Wolf AI, Monticelli L a, et al. Cooperativity  
698 between CD8+ T cells, non-neutralizing antibodies, and alveolar macrophages is  
699 important for heterosubtypic influenza virus immunity. *PLoS Pathog*  
700 2013;9:e1003207. doi:10.1371/journal.ppat.1003207.

701 [51] Guo H, Topham DJ. Multiple Distinct Forms of CD8 + T Cell Cross-Reactivity and  
702 Specificities Revealed after 2009 H1N1 Influenza A Virus Infection in Mice 2012;7:1–  
703 11. doi:10.1371/journal.pone.0046166.

704 [52] Roberts AD, Woodland DL. Cutting Edge: Effector Memory CD8+ T Cells Play a  
705 Prominent Role in Recall Responses to Secondary Viral Infection in the Lung. *J*  
706 *Immunol* 2004;172:6533–7. doi:10.4049/jimmunol.172.11.6533.

707 [53] Sridhar S, Begom S, Bermingham A, Ziegler T, Roberts KL, Barclay WS, et al.  
708 Predominance of heterosubtypic IFN- $\gamma$ -only-secreting effector memory T cells in  
709 pandemic H1N1 naive adults. *Eur J Immunol* 2012;42:2913–24.  
710 doi:10.1002/eji.201242504.

711 [54] Roberts AD, Ely KH, Woodland DL. Differential contributions of central and effector  
712 memory T cells to recall responses. *J Exp Med* 2005;202:123–33.

713            doi:10.1084/jem.20050137.

714

715

716 **Figure legends**

717 **Figure 1. Weight loss and survival rate of immunized mice after A(H1N1)pdm09 virus**  
718 **challenge.** Naïve mice (n=10) were sequentially infected with sublethal doses of two different  
719 strains (PR8 and then X31) of live virus (LV) with 28 days interval or were sequentially  
720 immunized with vaccines (WIV, SU) derived from these virus strains and then challenged with  
721 virus A/California/7/2009 (H1N1)pdm09. After challenge, mice (n=5) were monitored daily for  
722 weight loss (A) and survival (B) for a period of 14 days. On day 3 post-challenge, lung virus  
723 titers in 5 mice/group were determined by titration on MDCK cells (C). \* p<0.05, Mann-  
724 Whitney U test. The dashed line represents the limit of detection.

725

726 **Figure 2. Cross-reactive antibody immune response induced by sequential infection or**  
727 **immunization.** On day 28 post the second infection or immunization, serum samples and nasal  
728 washes were collected from the mice described in the legend to Fig. 1. Anti-H1N1pdm09-  
729 specific IgG (A; n=15), IgG2a and IgG1 (B; n=5) antibodies in serum samples were detected by  
730 ELISA. Microneutralization assay was used to determine the neutralizing ability of these  
731 antibodies towards A(H1N1)pdm09 virus (C; n=5). Anti-H1N1pdm09 IgA antibody levels in  
732 nasal washes were determined by ELISA (D; n=5). Data of individual animals (A, B, C) are  
733 depicted or mean values  $\pm$  SEM (D) are given, \*\*, p<0.01, \*\*\*, p<0.001. Mann-Whitney U test.  
734 The dashed line represents the limit of detection.

735 **Figure 3. Cross-reactive antibodies against conserved proteins induced by sequential**  
736 **infection or immunization.** Mice were primed and boosted as described in the legend to Fig  
737 1. Serum samples were collected 28 days post boost (day 0) or 3 days post-challenge (day 3).  
738 (A) Antibodies against A(H1N1)pdm09 NA protein on day 3 post-challenge were determined



739 by ELISA. Anti-M2e (B) and Anti-NP (C) antibodies titers were determined by ELISA. Data  
740 represent mean values  $\pm$  SEM.

741 **Figure 4. Memory T cell immune responses after sequential infection or immunization.** Of  
742 the mice described in the legend to Fig. 1, 5 animals/group were sacrificed 28 days after the  
743 second infection or immunization and spleen and lung were collected. (A) CD4+CD44+ and (B)  
744 CD8+CD44+ memory T cells in spleen and lung were determined by flow cytometry. (C)  
745 CD8+CD44+CD62L- effector memory T cells (TEM) and CD8+CD44+CD62L+ central memory T  
746 cells (TCM) in spleen. Left: representative dot plots depicting CD44 and CD62L expression on  
747 spleen CD8 T cells. Right: percentages of spleen CD8 TEM and TCM + SEM. (n=4 or 5 per group,  
748 representative of two experiments, Mann-Whitney U test, \*,  $p < 0.05$ ).

749

750 **Figure 5. Influenza-specific T cell immune responses induced by sequential infection or**  
751 **immunization.** (A) Splenocytes harvested on day 28 post the second infection/vaccination,  
752 were stimulated with A(H1N1)pdm09 WIV and anti-CD28 overnight in presence of protein  
753 transport inhibitor. Presence of intracellular IFN $\gamma$  in CD4+CD44+ and CD8+CD44+ T cells was  
754 analyzed by flow cytometry. Left: representative dot plots of stimulated CD4 or CD8 T cells  
755 stained for CD44 and IFN $\gamma$ . Right: percentages of IFN $\gamma$ -producing cells among CD4+CD44+ and  
756 CD8+CD44+ T cells. (n=4 or 5, representative of two experiments, Mann-Whitney U test, \*,  
757  $p < 0.05$ ). (B) On day 28 post the second infection/immunization, NP366-374 of PR8 virus was  
758 used to stimulate mouse splenocytes and IFN $\gamma$ -producing CD8 T cells were enumerated by  
759 ELISPOT. (n=5, Mann-Whitney U test, \*\*,  $p < 0.01$ ). (C) A(H1N1)pdm09 NP366-374-specific CD8  
760 T cells in spleens of infected/immunized mice (n=5) were determined by tetramer assay.

761 Lymphocytes from the blood sample of mice (n=2) infected with A(H1N1)pdm09 virus served  
762 as positive control.

763

764 **Figure 6. The cross-protective potential of antibodies induced by sequential infection or**  
765 **immunization.** Mice (n=5) were primed with PR8 virus ( $10^3$ TCID<sub>50</sub>) or PR8 WIV (15μg) and  
766 boosted with X-31 virus ( $10^3$ TCID<sub>50</sub>) or X-31 WIV (15μg). Mice primed and boosted with PBS  
767 served as negative control and mice primed and boosted with A(H1N1)pdm09 WIV (15μg)  
768 served as positive control. Sera from these mice were collected 4 weeks after boost, pooled  
769 and injected into naïve mice one day before challenge with A/California/7/2009 (H1N1)pdm09  
770 virus. Body weight loss (A) was monitored daily for 6 days. Virus titers in the lung tissue (B) on  
771 day 6 post-challenge were determined by titration on MDCK cells. \*\*, p<0.01, Mann-Whitney  
772 U test. The dashed line represents limit of detection. NS, not significant.

773

774 **Figure 7. The cross-protective potential of CD4 T cells and CD8 T cells induced by sequential**  
775 **infection or immunization.** Mice were primed with PR8 virus ( $10^3$ TCID<sub>50</sub>) or PR8 WIV (15μg)  
776 and then boosted with X-31 virus ( $10^3$ TCID<sub>50</sub>) or X-31 WIV (15μg). Mice primed and boosted  
777 with PBS served as control. Anti-CD4, anti-CD8 T cell depletion antibody or PBS were injected  
778 intraperitoneally into mice on day -1, 1 and 3 of A(H1N1)pdm09 challenge. Weight loss (A) was  
779 monitored for 6 days and lung virus titers (B) were determined on day 6 post-infection by  
780 titration on MDCK cells. \*, p<0.05, Mann-Whitney U test. The dashed line represents limit of  
781 detection.

782 **Figure 1**

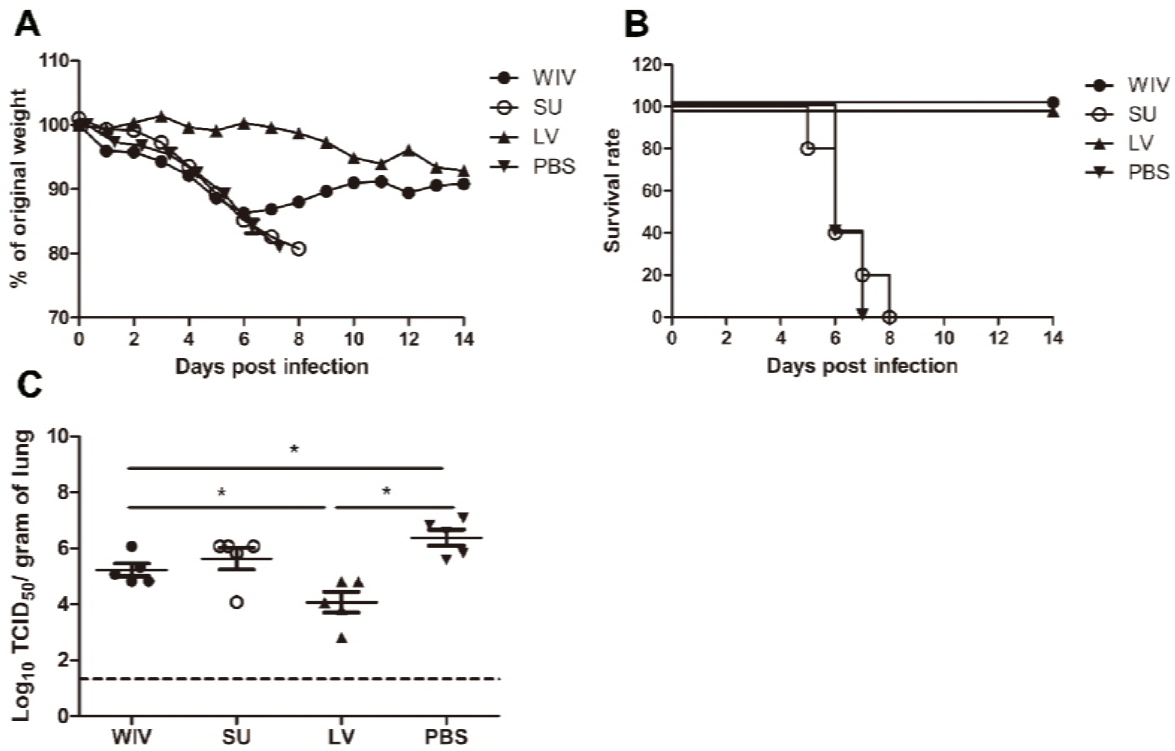

783

784 **Figure 2**

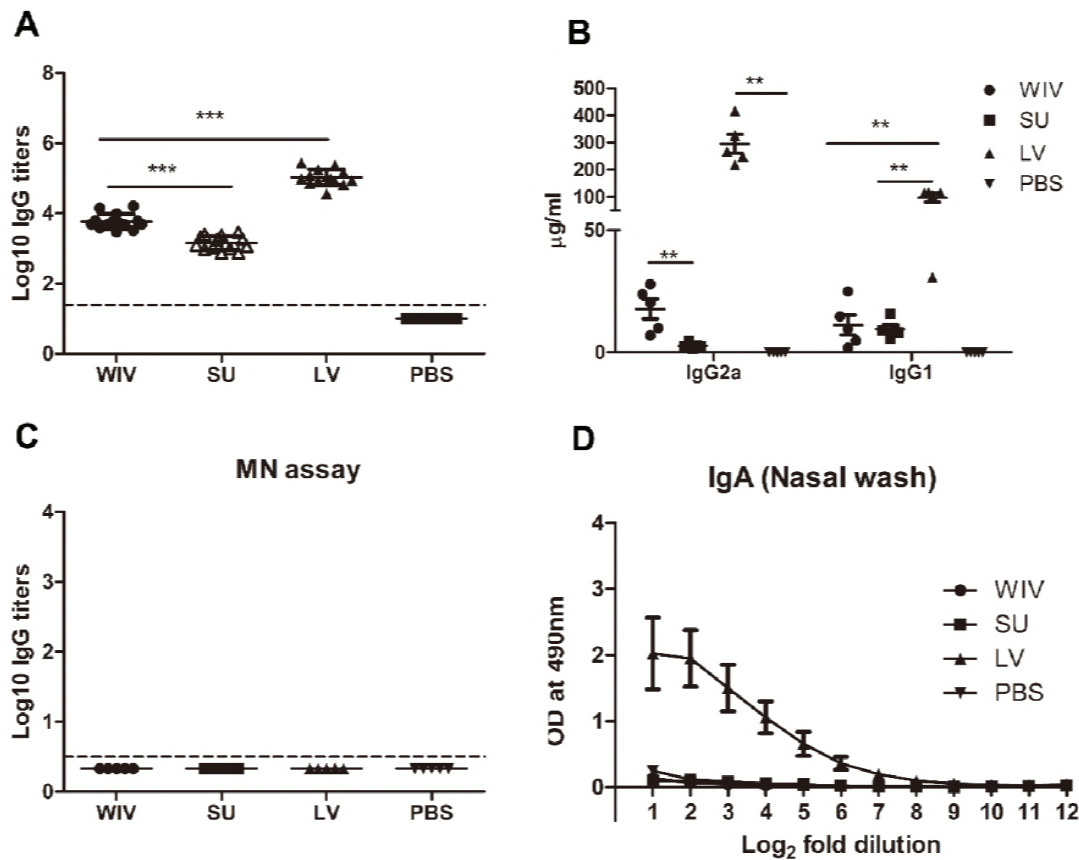

785

786 **Figure 3**

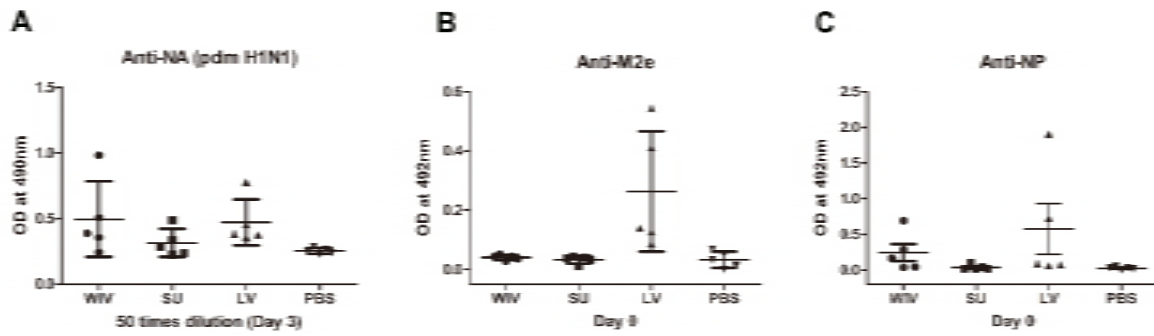

787

788 **Figure 4**

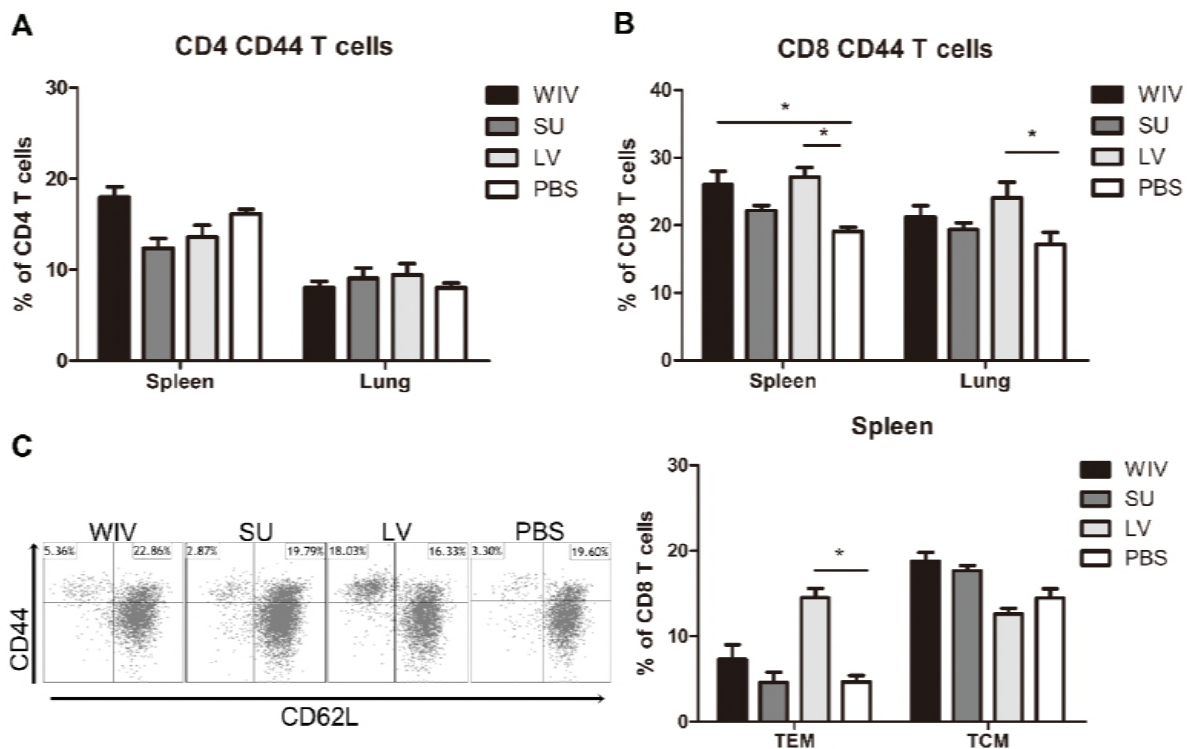

789

790

791 **Figure 5**

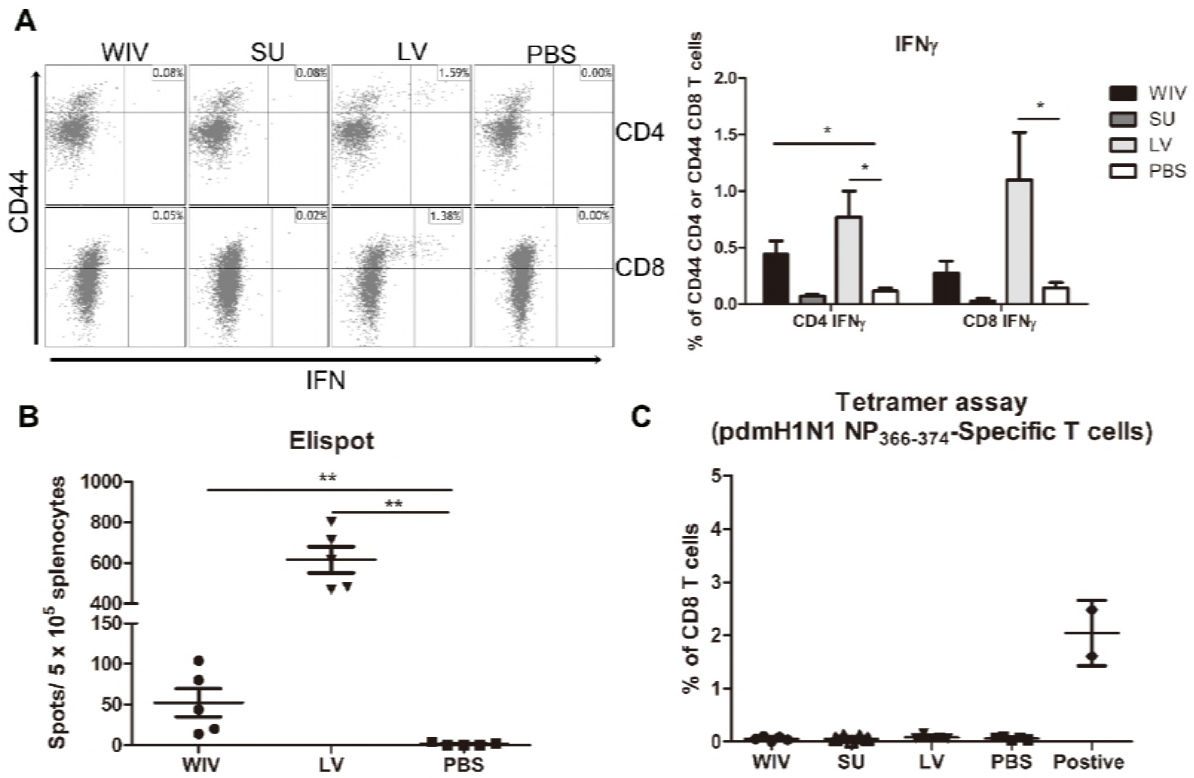

792

793 **Figure 6**

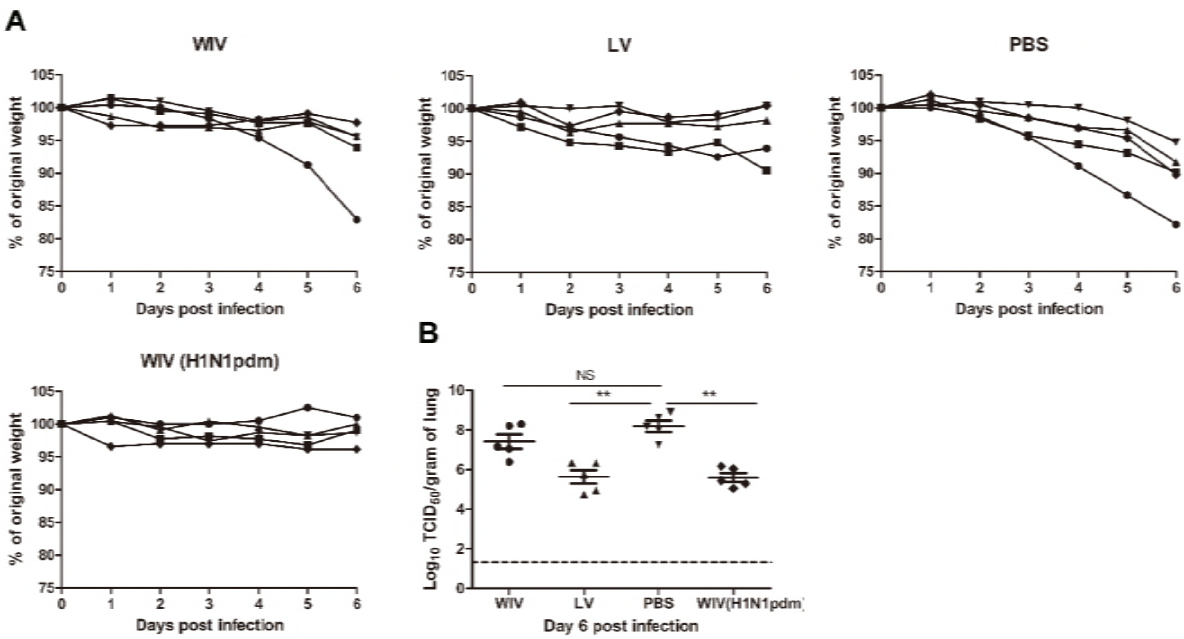

794

795

796 **Figure 7**

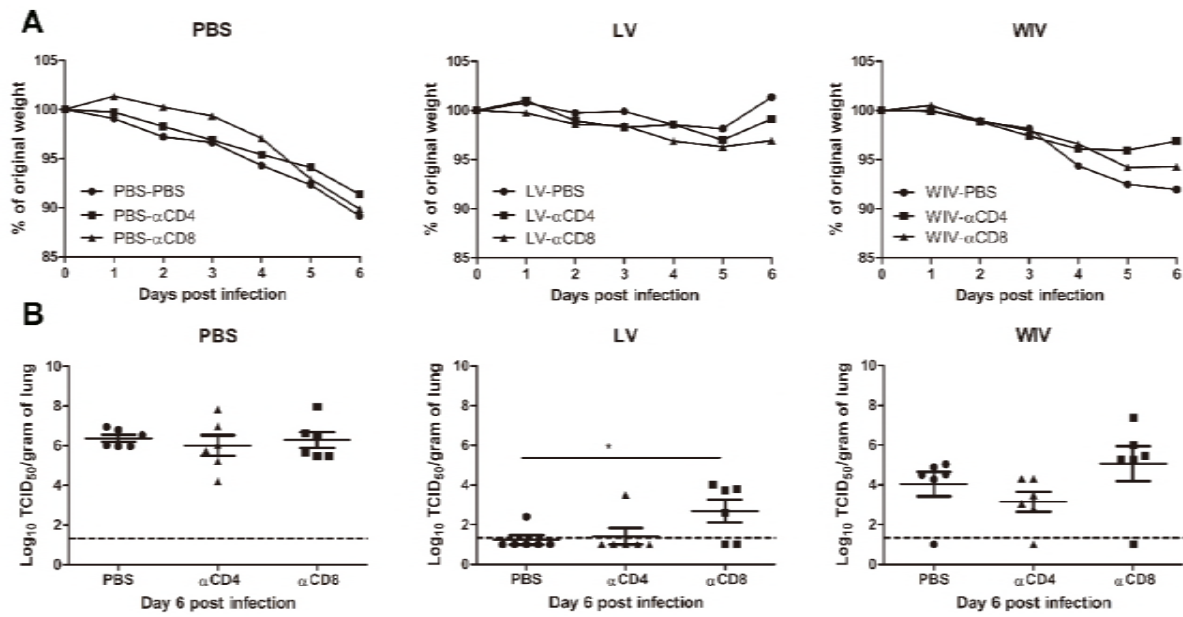

797

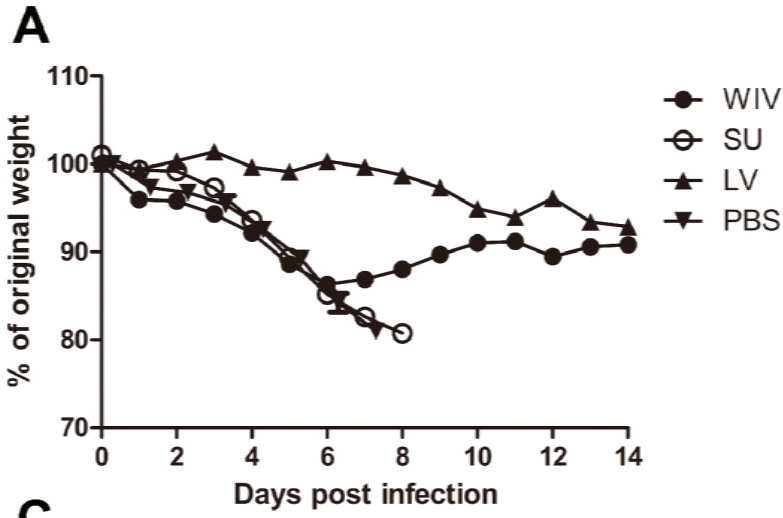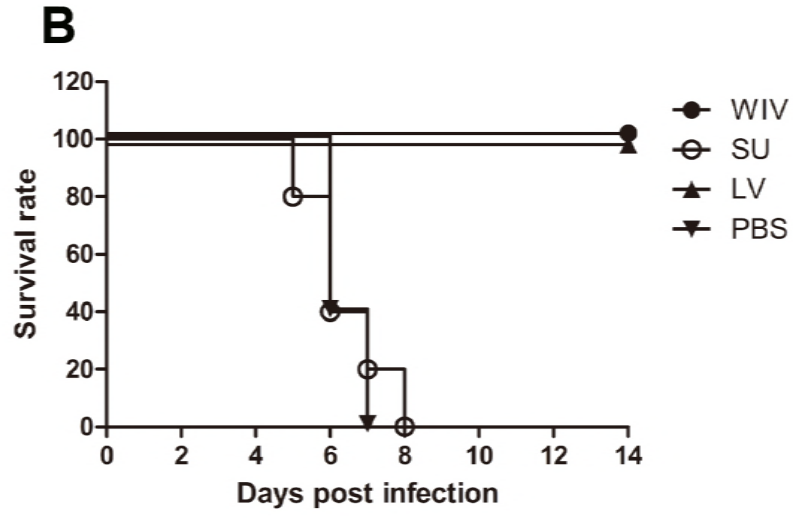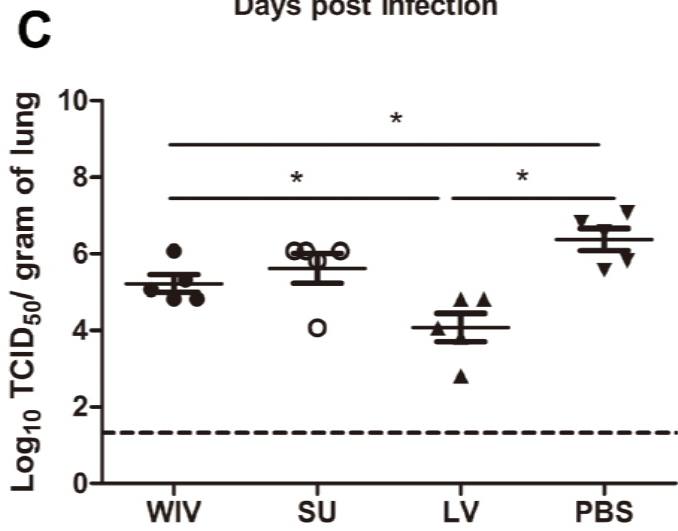

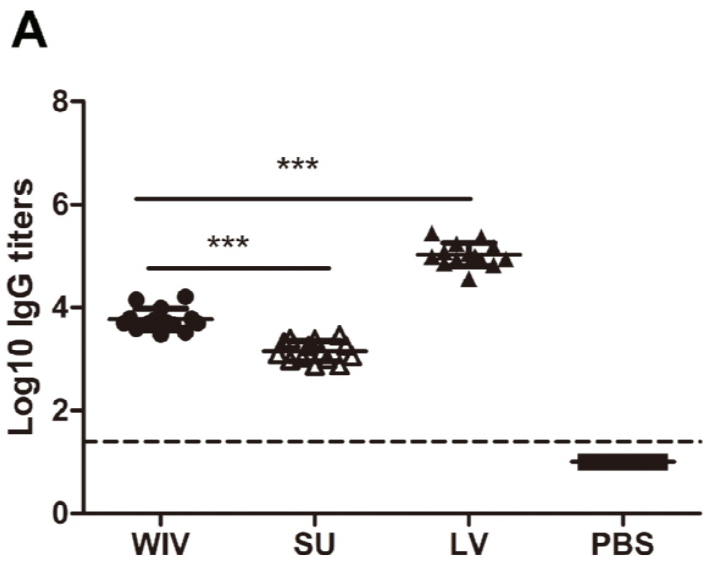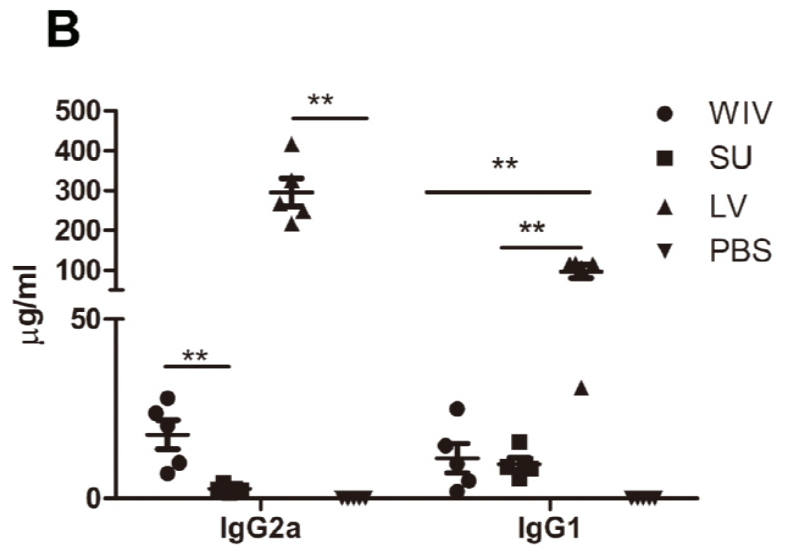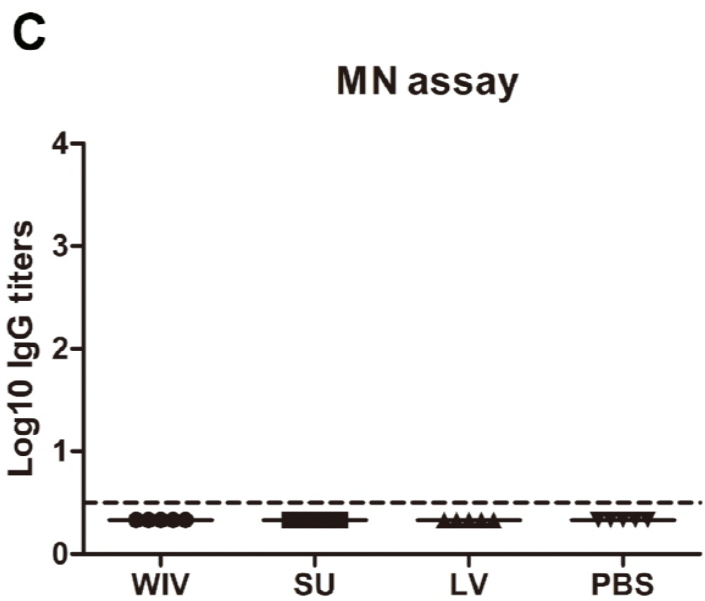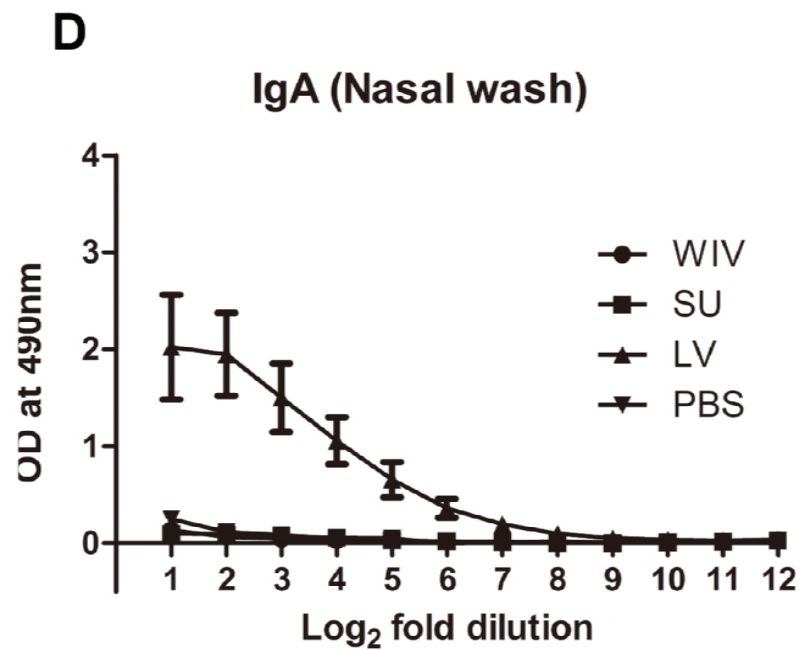



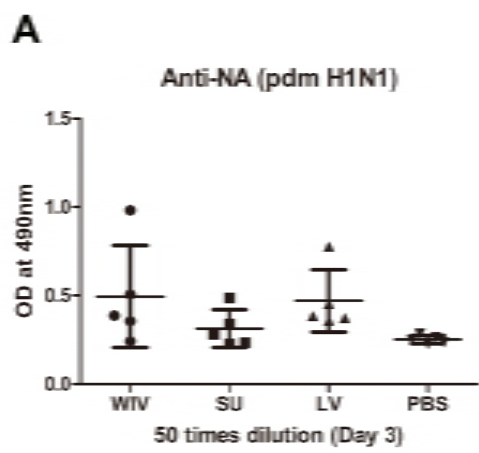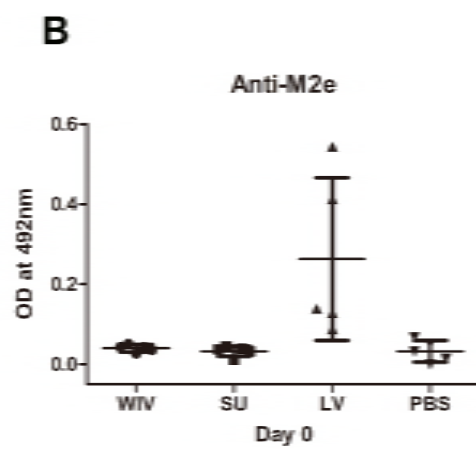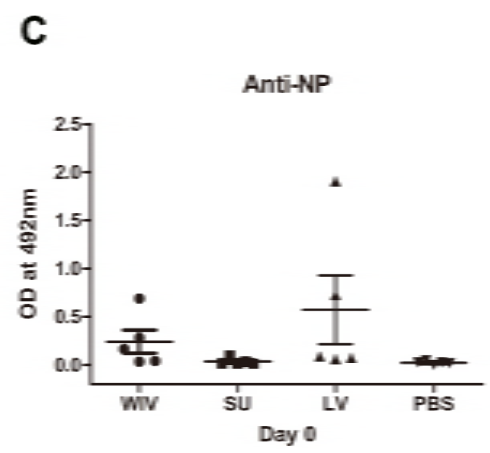

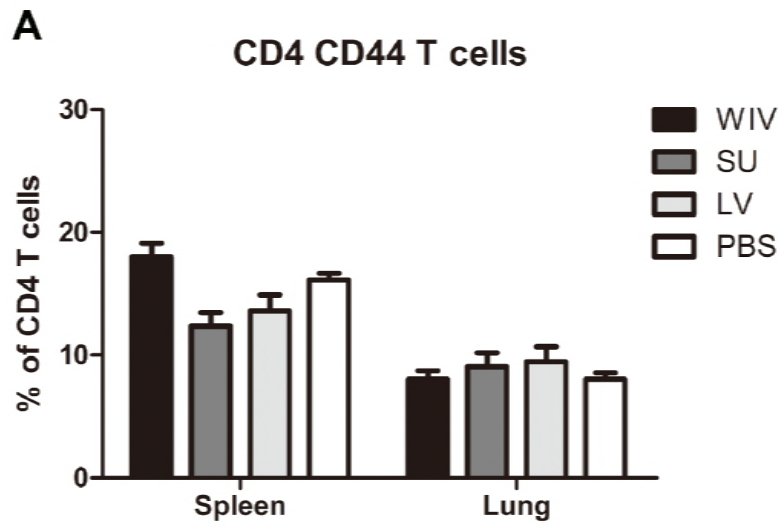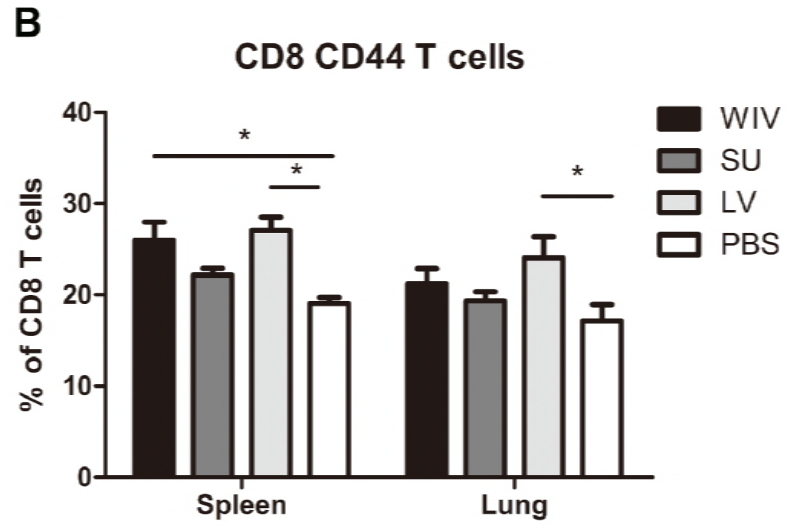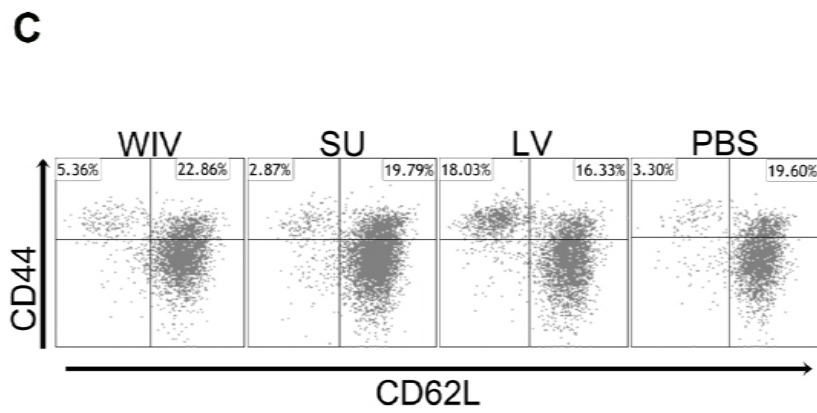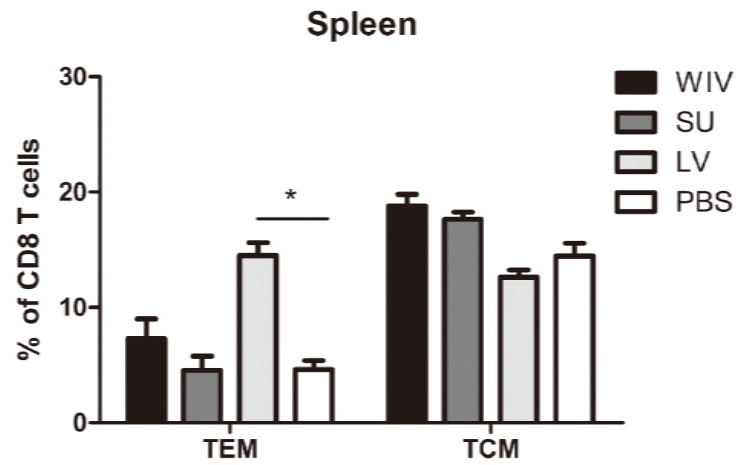

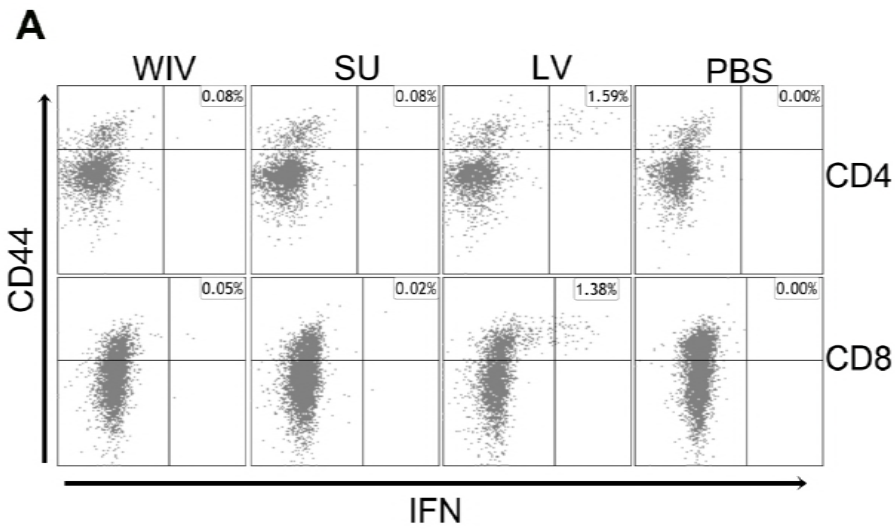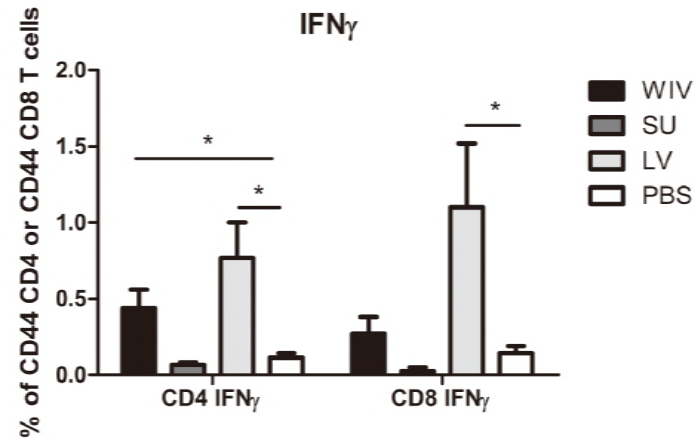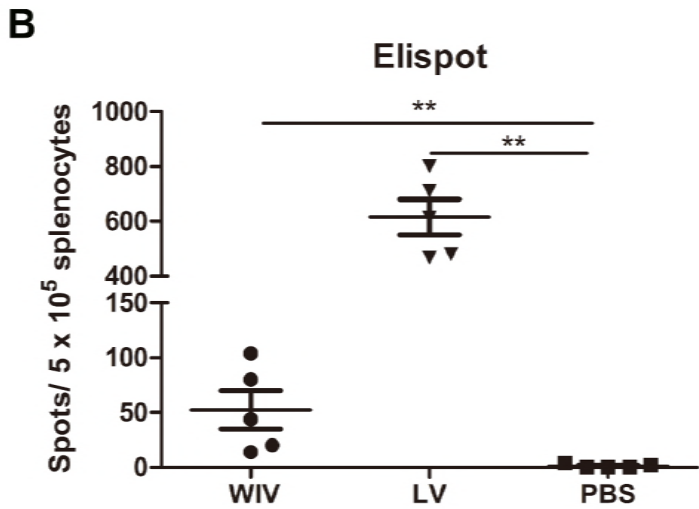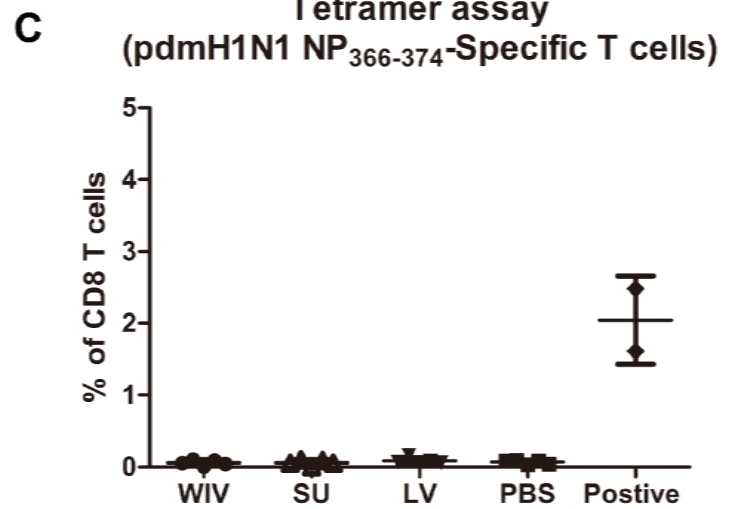

**A**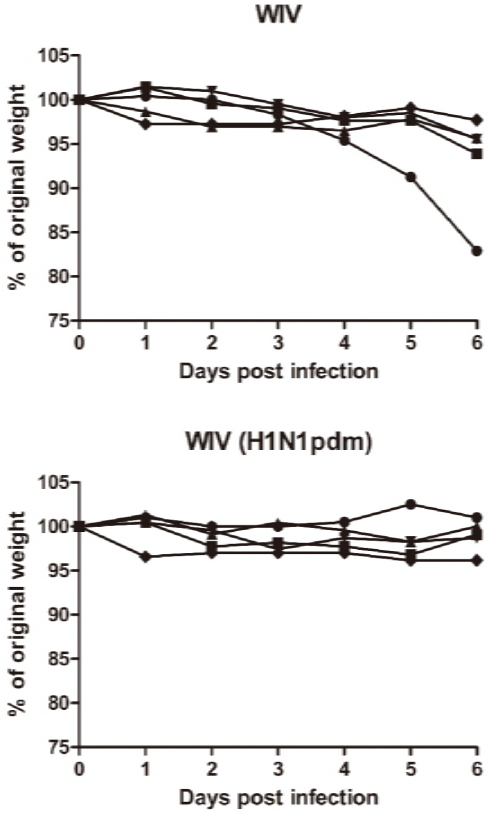**B**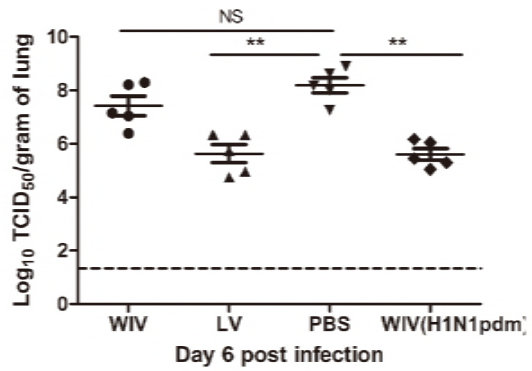

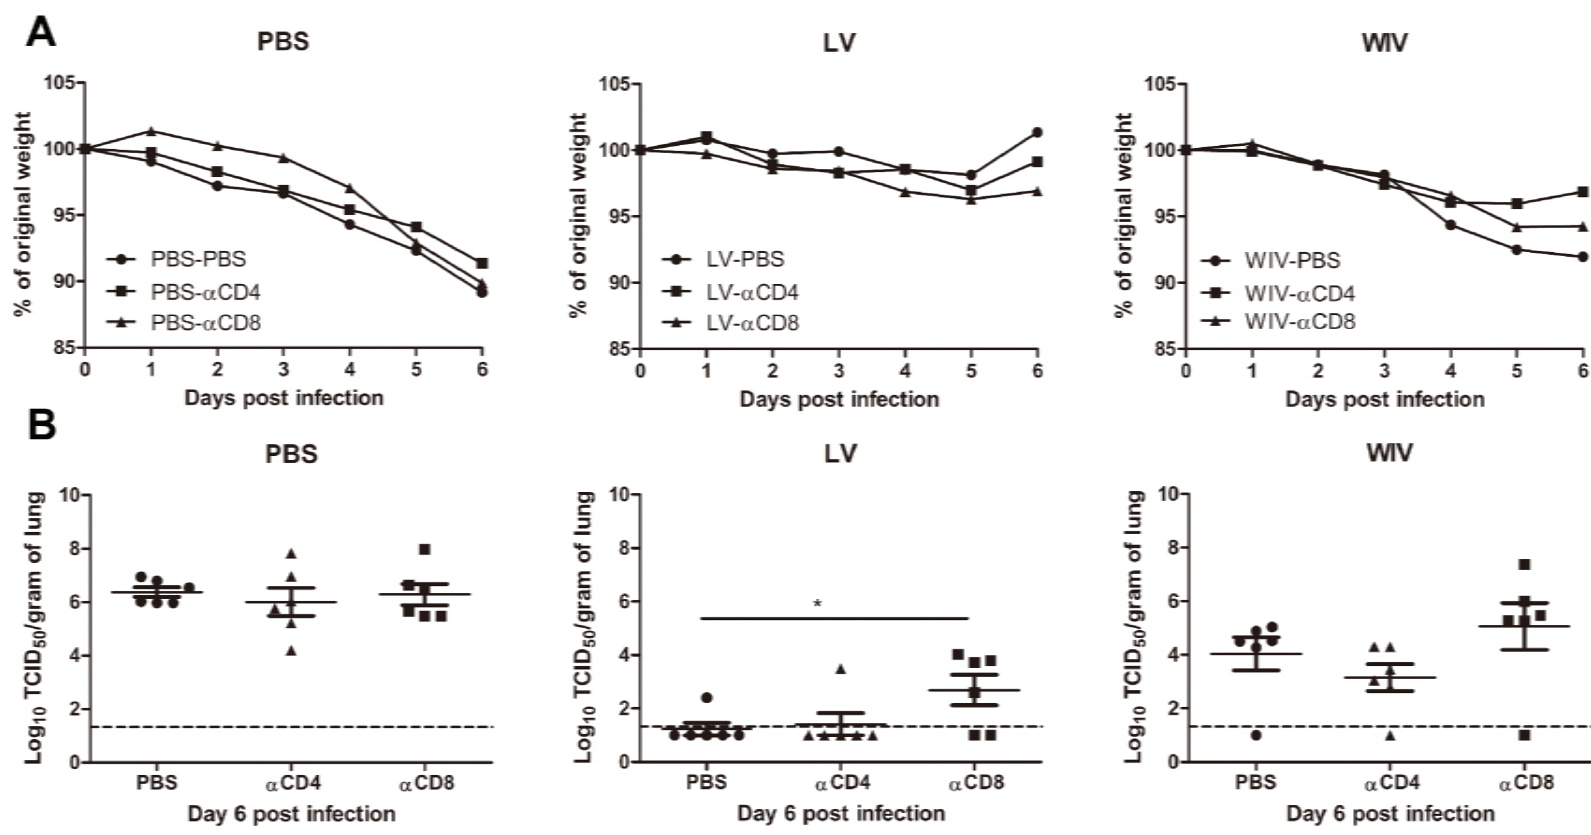

Source: https://www.biorxiv.org/content/10.1101/335281v1.full.pdf
